# Supplementary material for: Chemical Constituents with Inhibitory Activity of NO Production from a Wild Edible Mushroom, Russula vinosa Lindbl, May Be Its Nutritional Ingredients
Source: MDPI journal article supplement (doi:10.3390/molecules24071305), 2019-04-03
Supplement: s1 [file s1]

# Chemical constituents with inhibitory activity of NO production from a wild edible mushroom, *Russula vinosa* Lindbl, may be its nutritional ingredients

Guodong Zhang <sup>1</sup>, Huawei Geng <sup>2</sup>, Chunxia Zhao <sup>1</sup>, Fangyi Li <sup>1</sup>, Zhen-Fa Li <sup>1</sup>, Boshu Lun <sup>1</sup>, Chunhua Wang <sup>1,3,\*</sup>, Heshui Yu <sup>1</sup>, Songtao Bie <sup>1</sup> and Zheng Li <sup>1,3,\*</sup>

<sup>1</sup> College of Pharmaceutical Engineering of Traditional Chinese Medicine, Tianjin University of Traditional Chinese Medicine, Tianjin 300193, China; pharmgd@126.com (G.Z.); zhaochunxia199411@163.com (C.Z.); li\_fangyi@hotmail.com (F.L.); lizhenxiaofa@163.com (Z.-F.L.); lbsxcl@163.com (B.L.); hs\_yu08@163.com (H.Y.); biesongtao@126.com (S.B.)

<sup>2</sup> Chongqing Municipal Public Security Bureau Evidence Identification Center, Chongqing 400707, China; huaweigeng0414@sina.com

<sup>3</sup> Tianjin Key Laboratory of Modern Chinese Medicine, Tianjin University of Traditional Chinese Medicine, Tianjin 300193, China

\* Correspondence: pharmwch@126.com (C.W.); lizheng@tjutcm.edu.cn (Z.L.); Tel./Fax: +86-22-5979-1813 (C.W.)

## Supplementary Materials

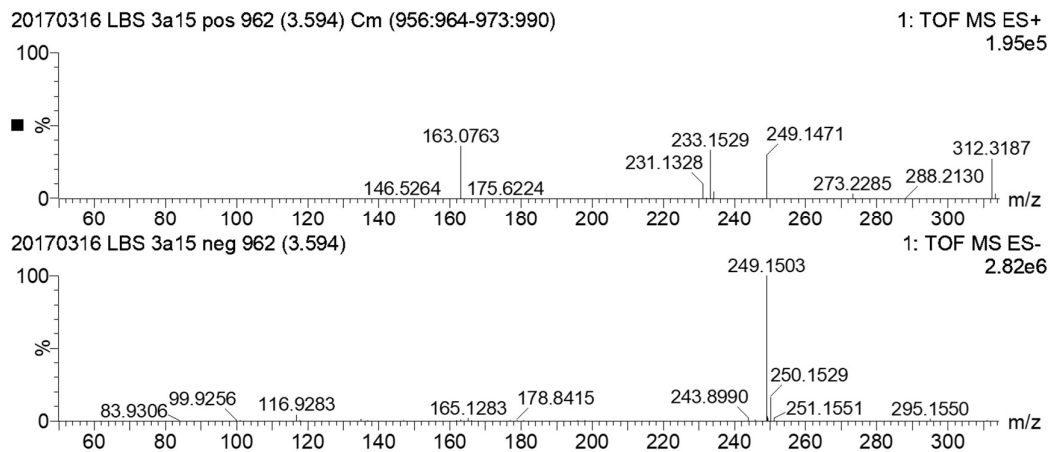

**Figure S1.** HR-ESI-MS spectrum of compound **1**

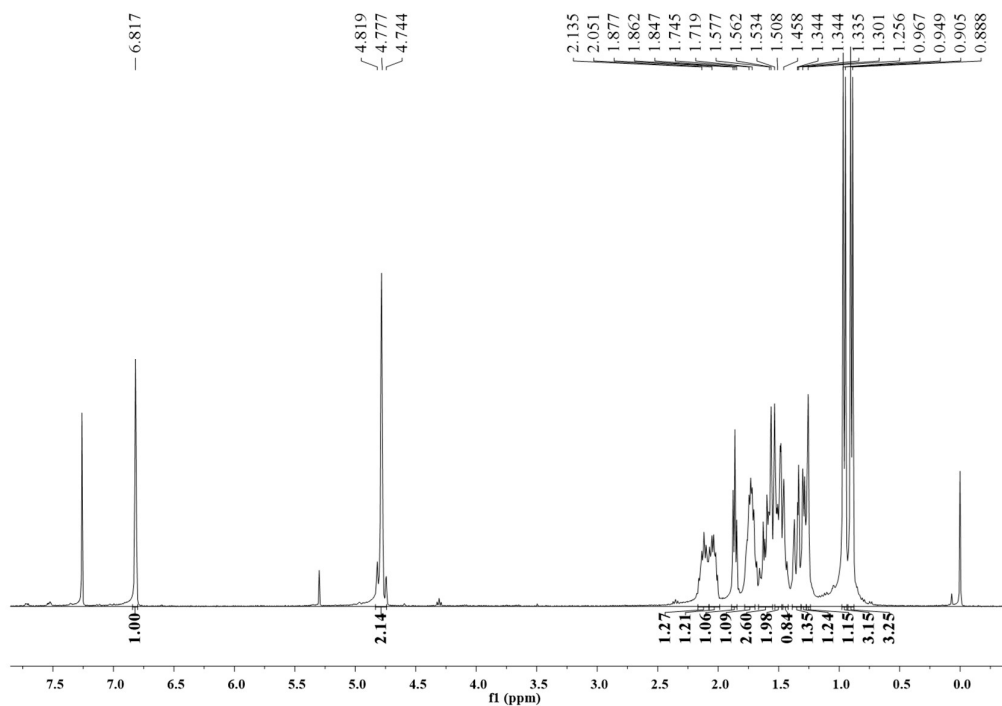

**Figure S2.**  $^1\text{H}$ -NMR spectrum of compound **1**

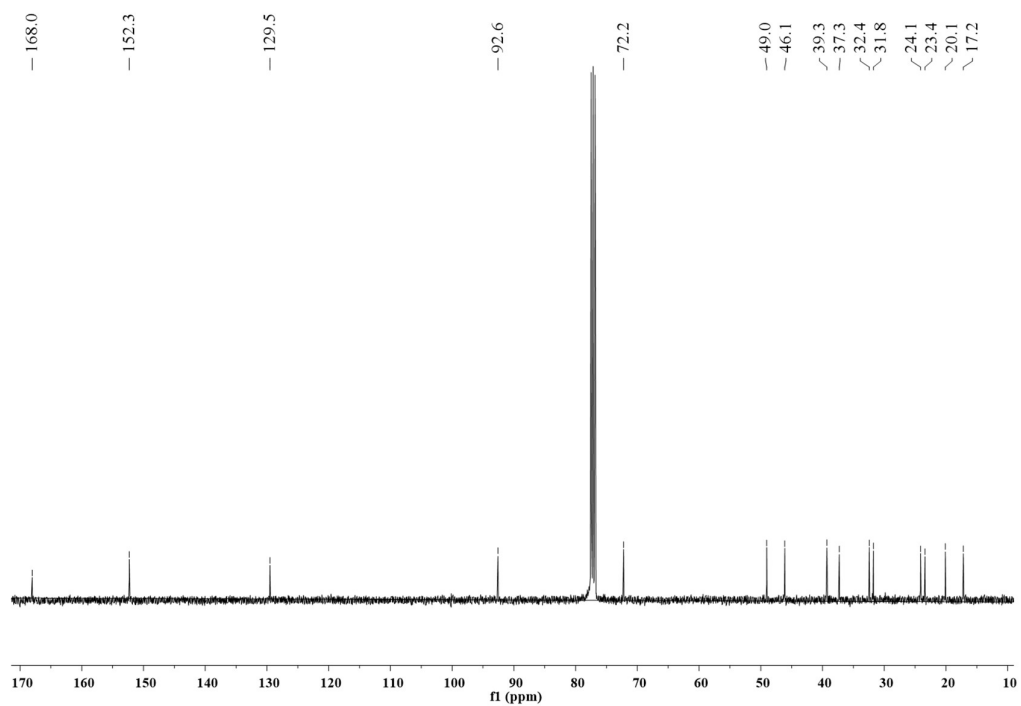

**Figure S3.**  $^{13}\text{C}$ -NMR spectrum of compound **1**

3-15  
NT-S20160114-041  
C13DEPT135 CDC13 D:\nmr\_data ham  
2 2

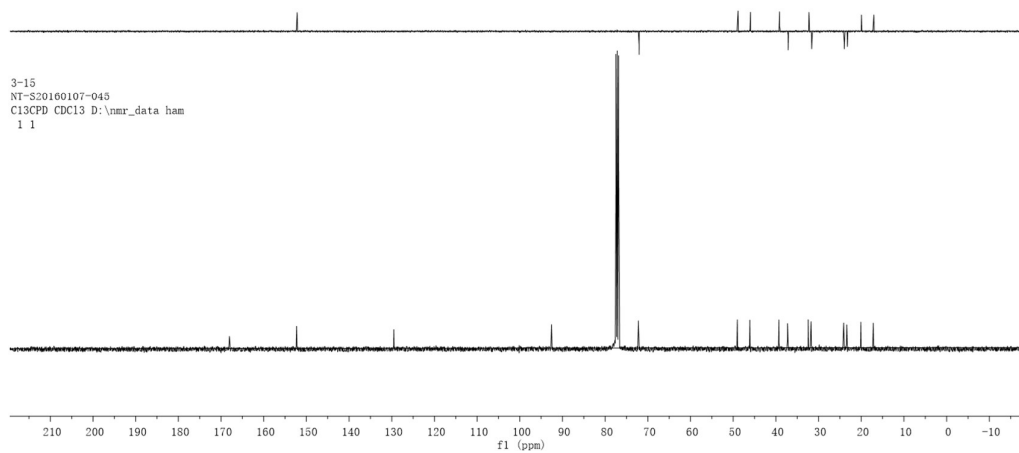

**Figure S4.** DEPT-135 spectrum of compound **1**

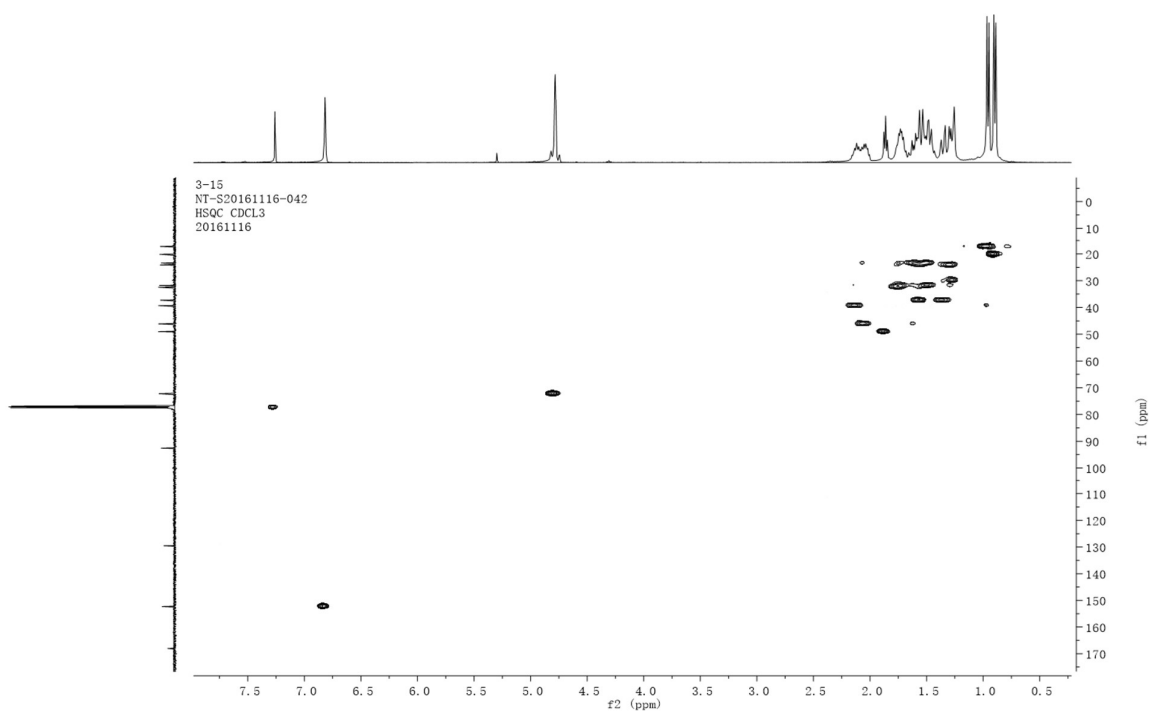

Figure S5. HSQC spectrum of compound **1**

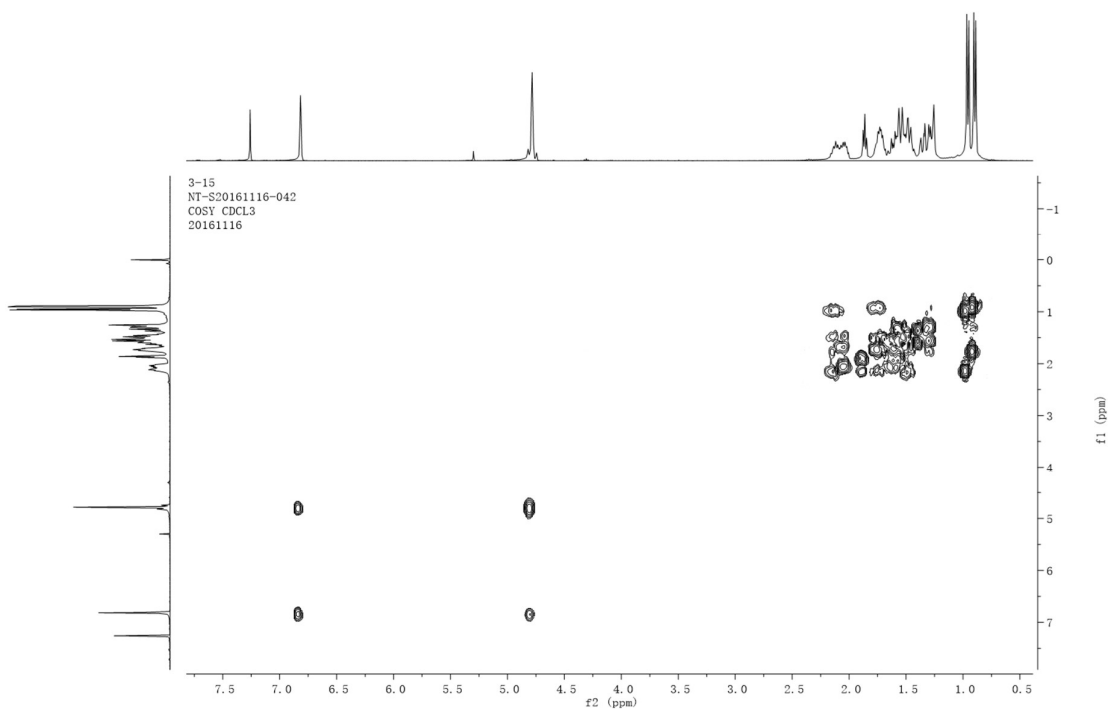

Figure S6.  $^1\text{H}$ - $^1\text{H}$  COSY spectrum of compound **1**

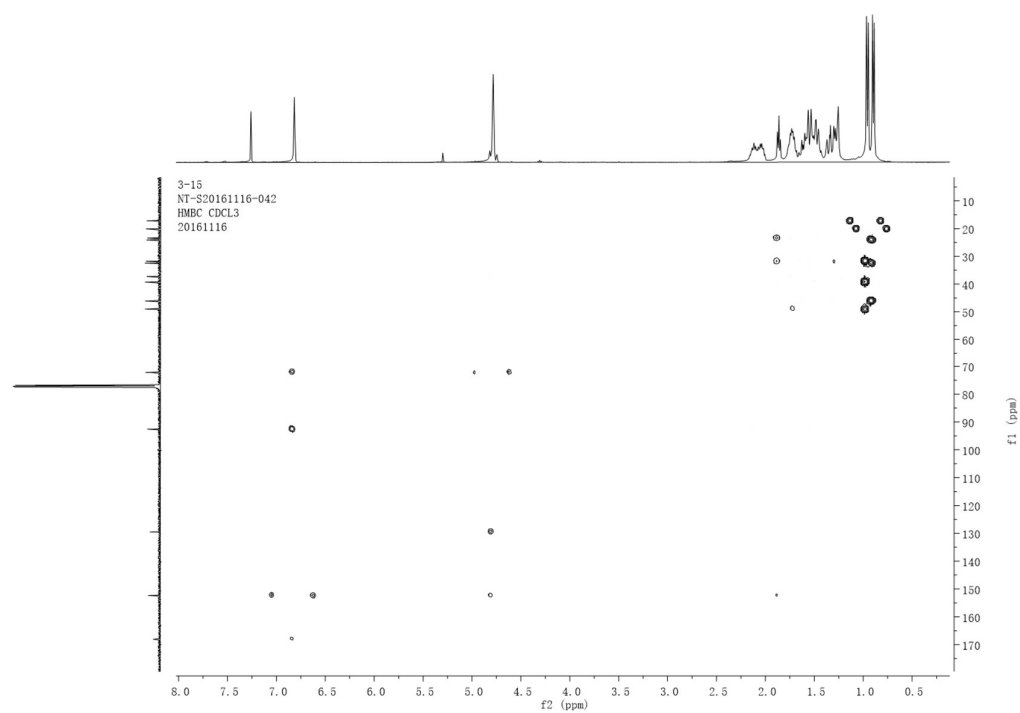

**Figure S7.** HMBC spectrum of compound **1**

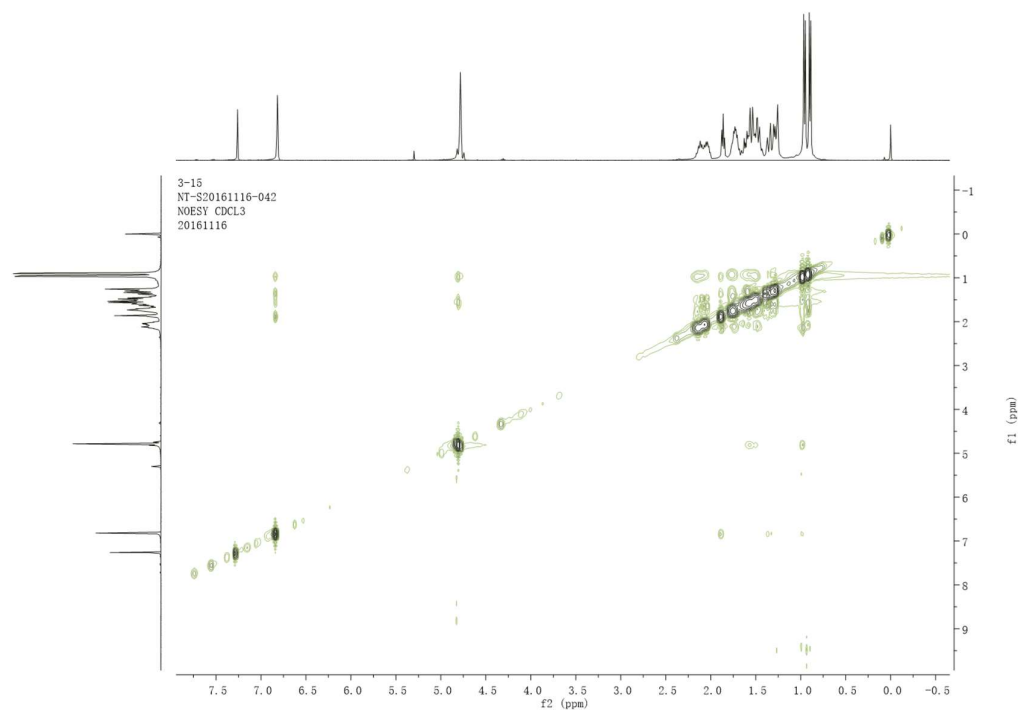

**Figure S8.** NOESY spectrum of compound **1**

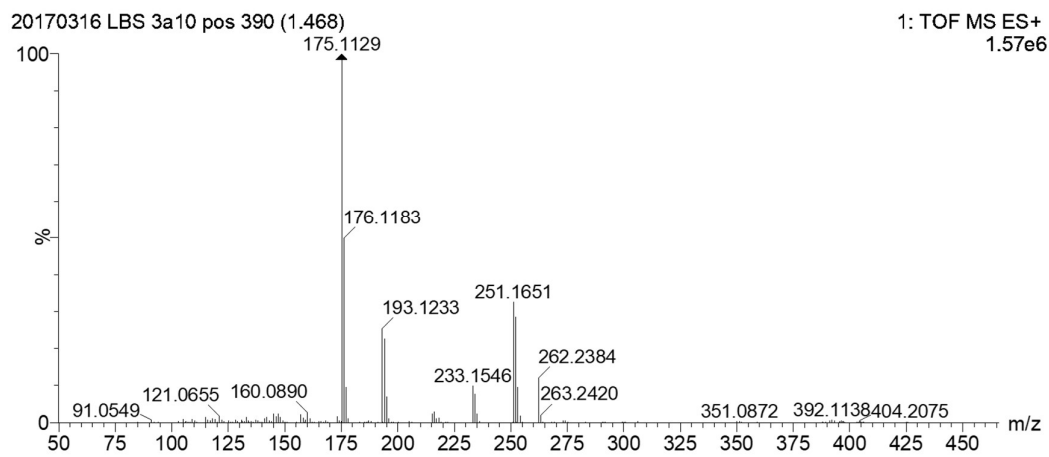

**Figure S9.** HR-ESI-MS spectrum of compound **2**

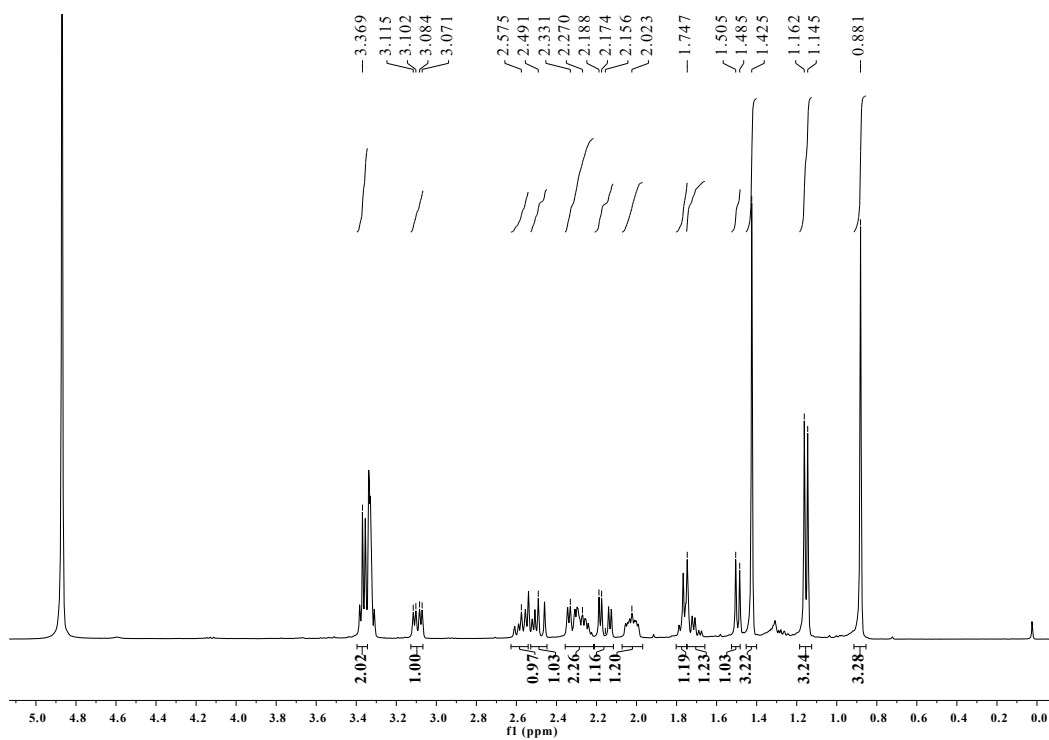

**Figure S10.**  $^1\text{H}$ -NMR spectrum of compound **2**

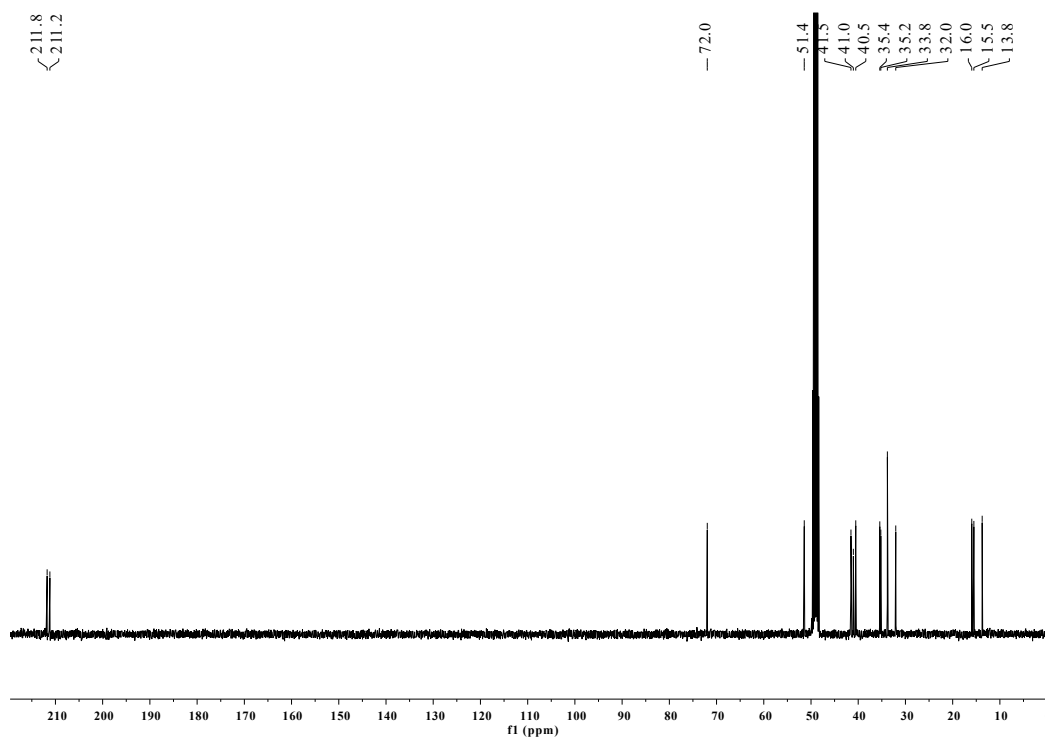

Figure S11.  $^{13}\text{C}$ -NMR spectrum of compound 2

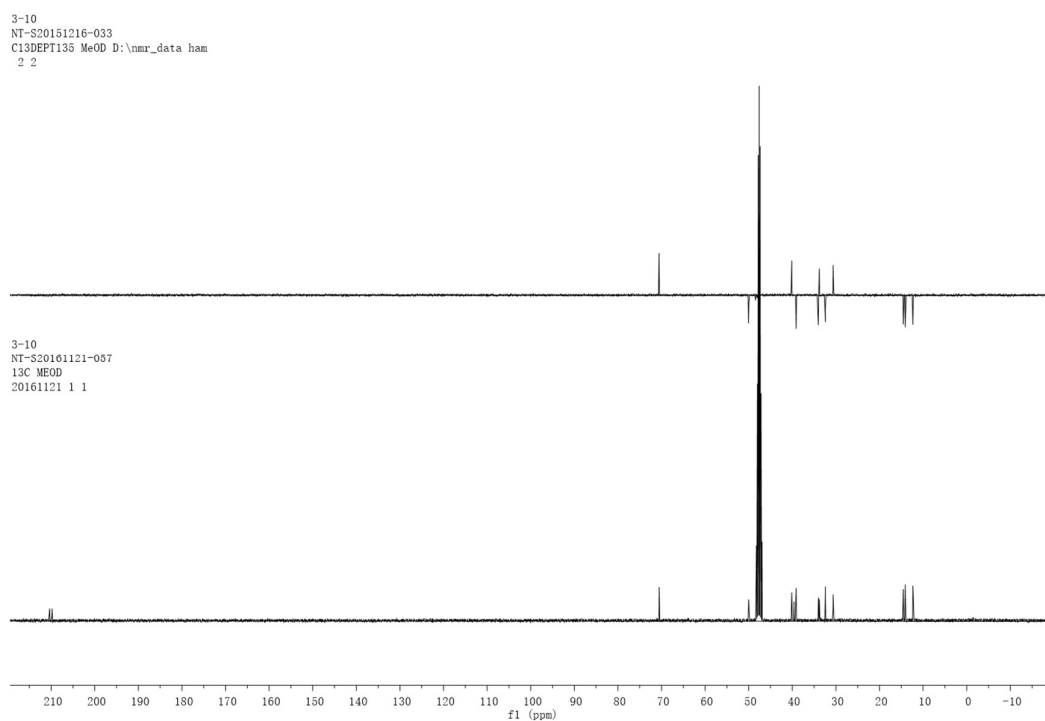

Figure S12. DEPT-135 spectrum of compound 2

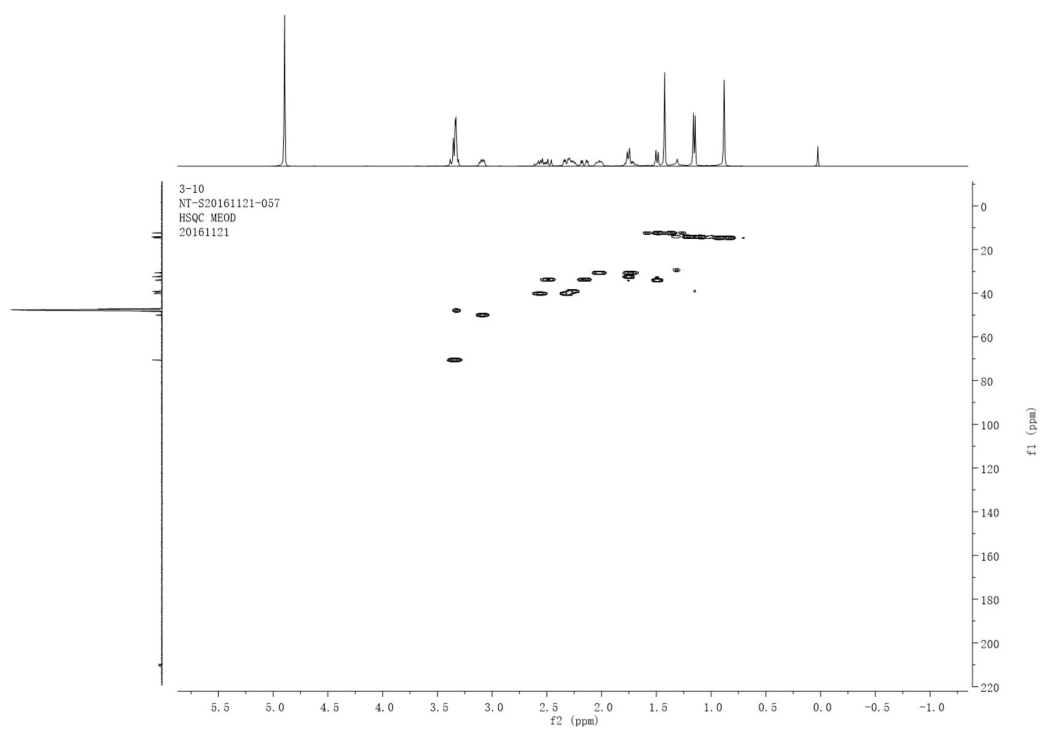

**Figure S13.** HSQC spectrum of compound 2

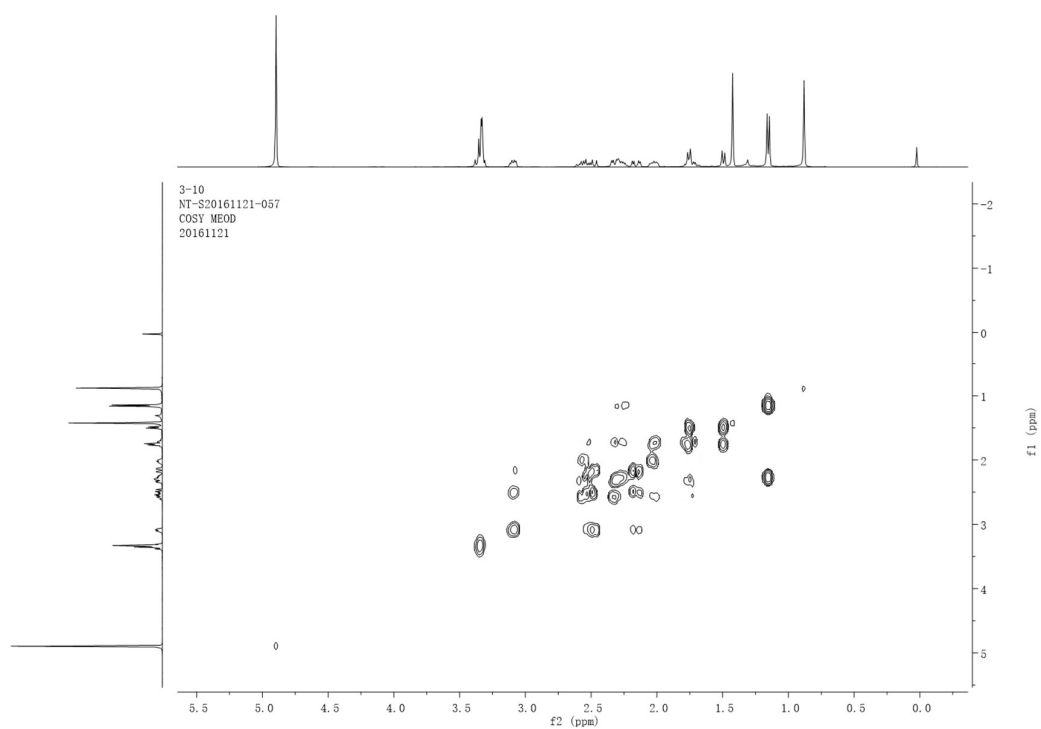

**Figure S14.**  $^1\text{H}$ - $^1\text{H}$  COSY spectrum of compound 2



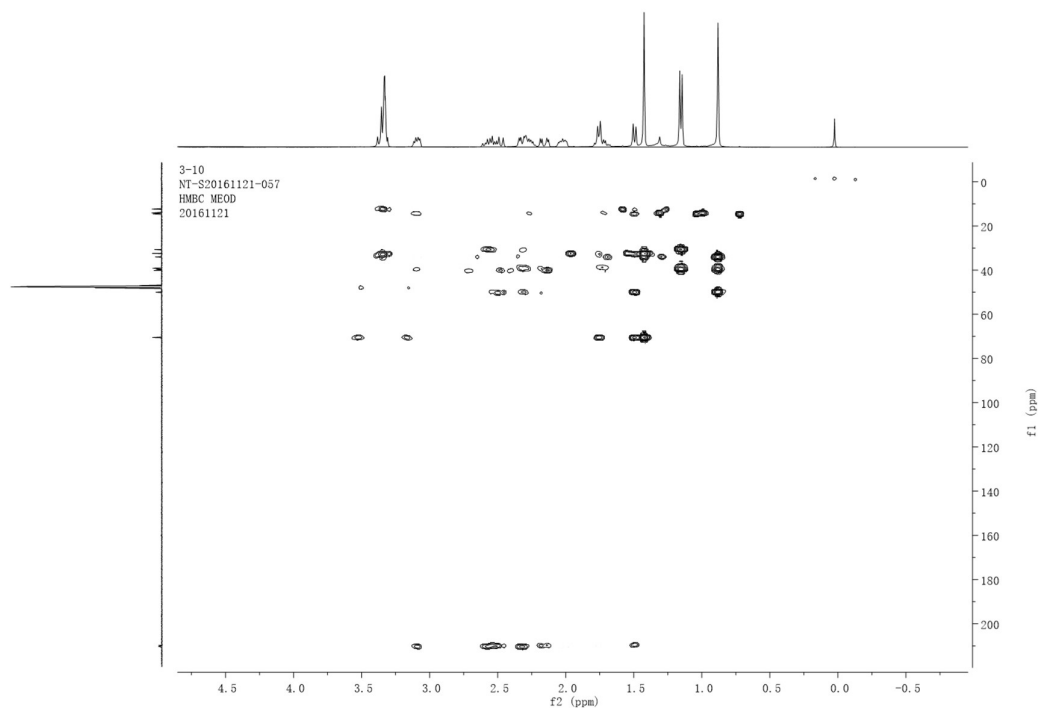

**Figure S15.** HMBC spectrum of compound **2**

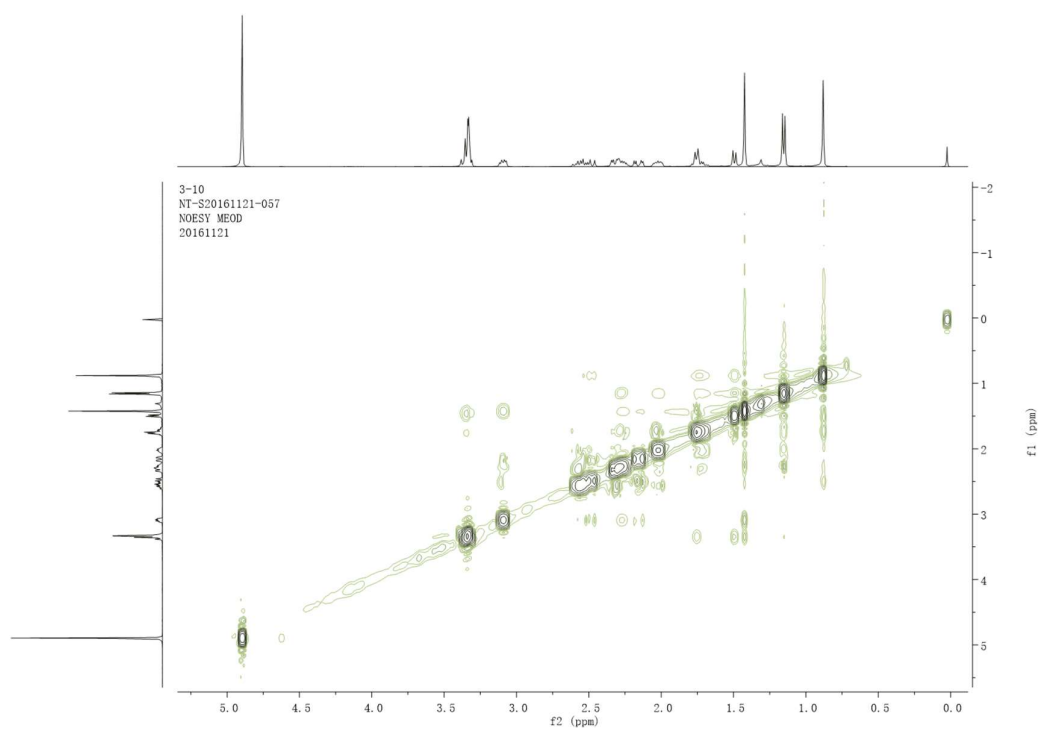

**Figure S16.** NOESY spectrum of compound **2**

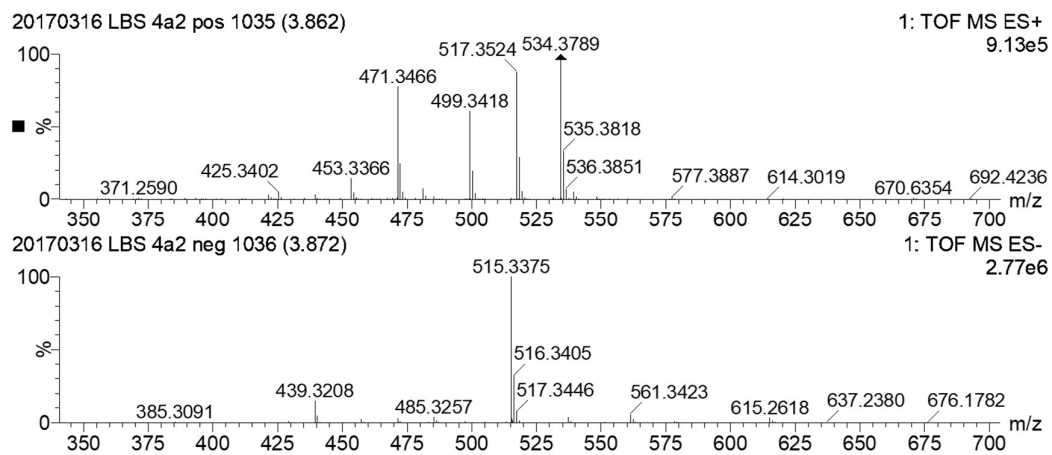

Figure S17. HR-ESI-MS spectrum of compound 3

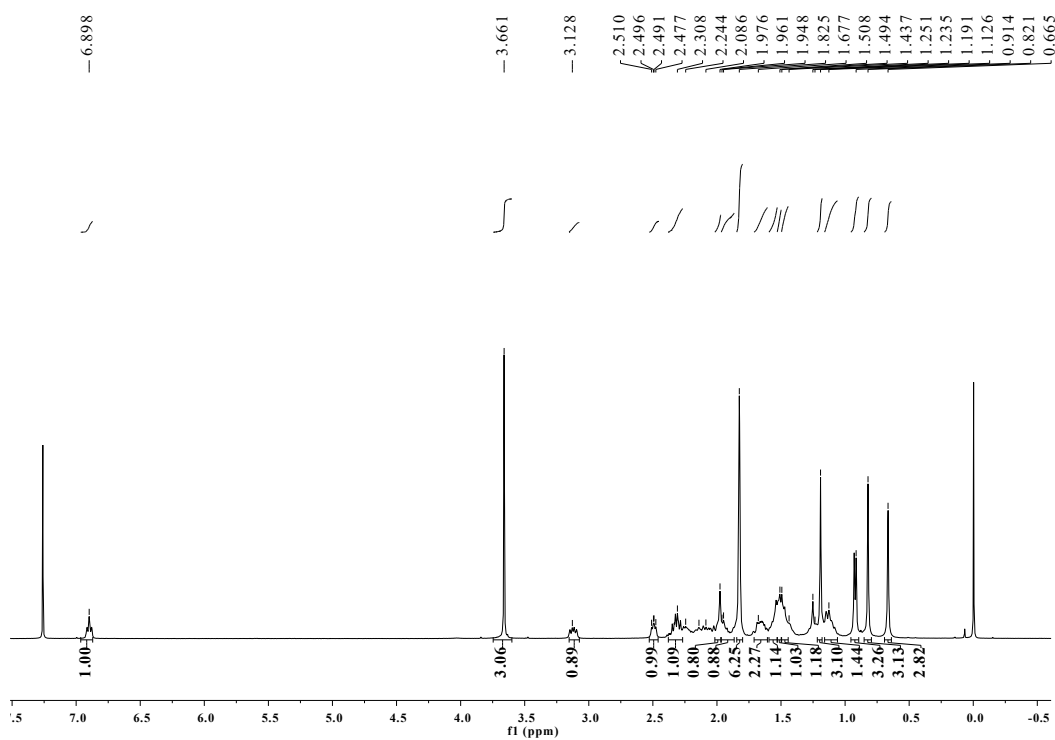

Figure S18.  $^1\text{H}$ -NMR spectrum of compound 3

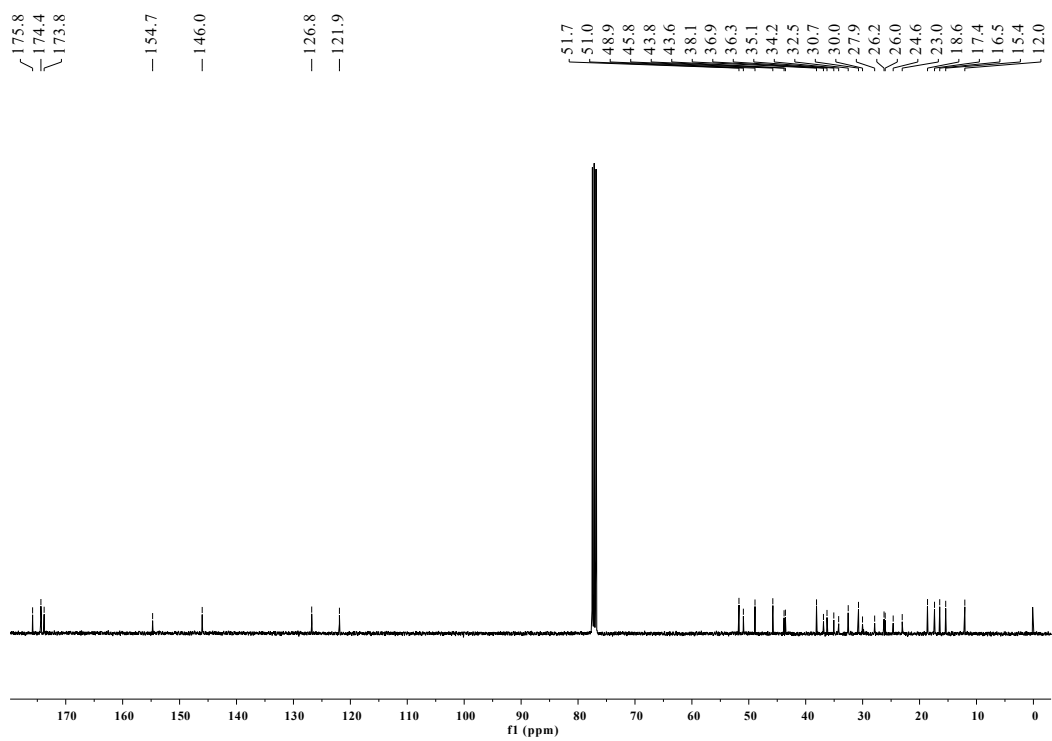

**Figure S19.**  $^{13}\text{C}$ -NMR spectrum of compound **3**

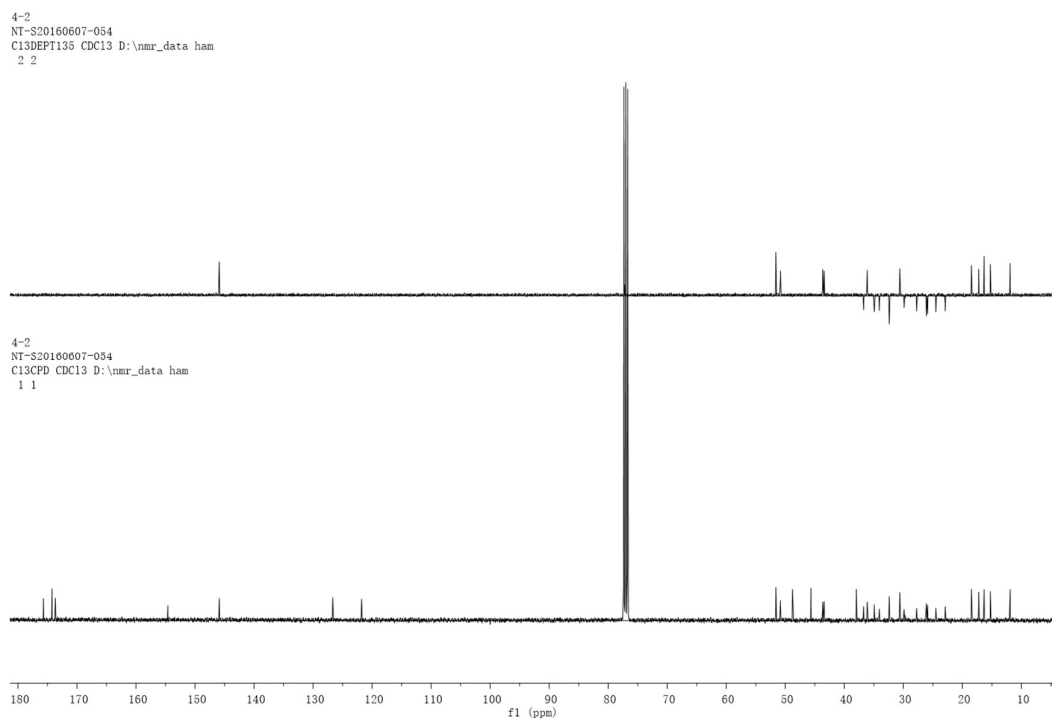

**Figure S20.** DEPT-135 spectrum of compound **3**

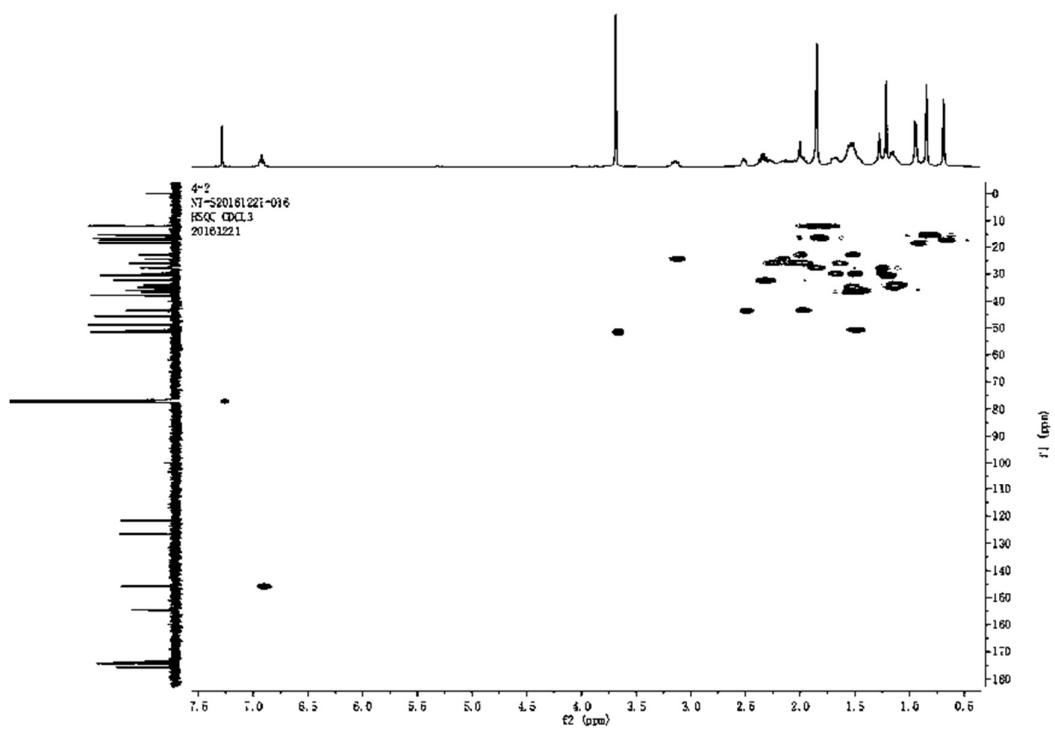

Figure S21. HSQC spectrum of compound 3

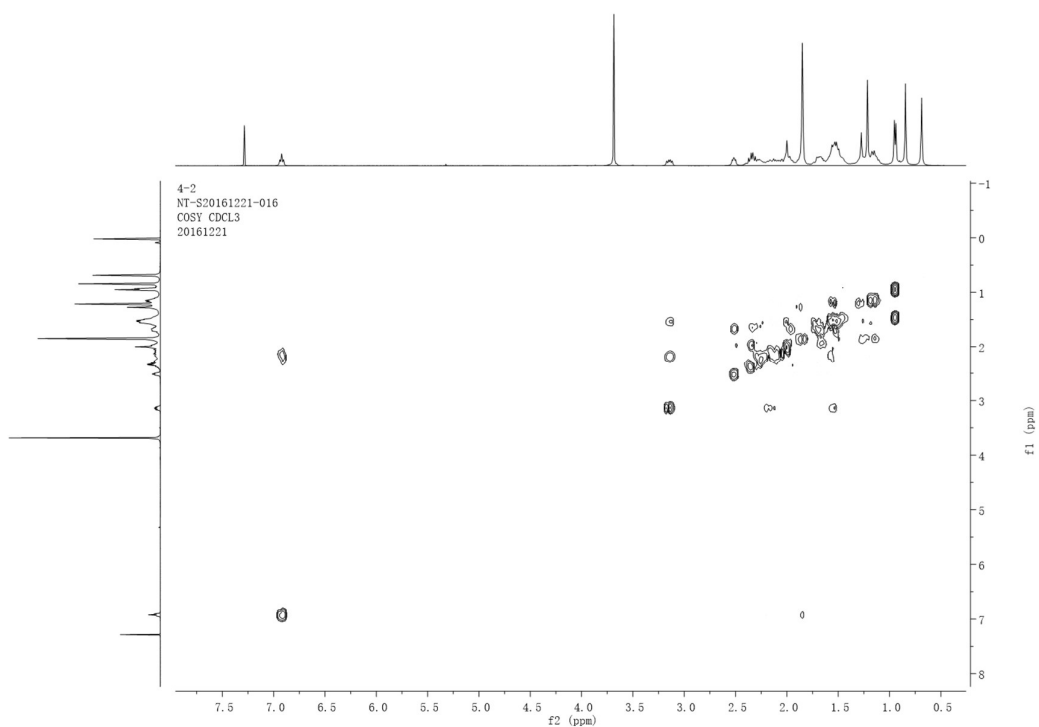

Figure S22.  $^1\text{H}$ - $^1\text{H}$  COSY spectrum of compound 3

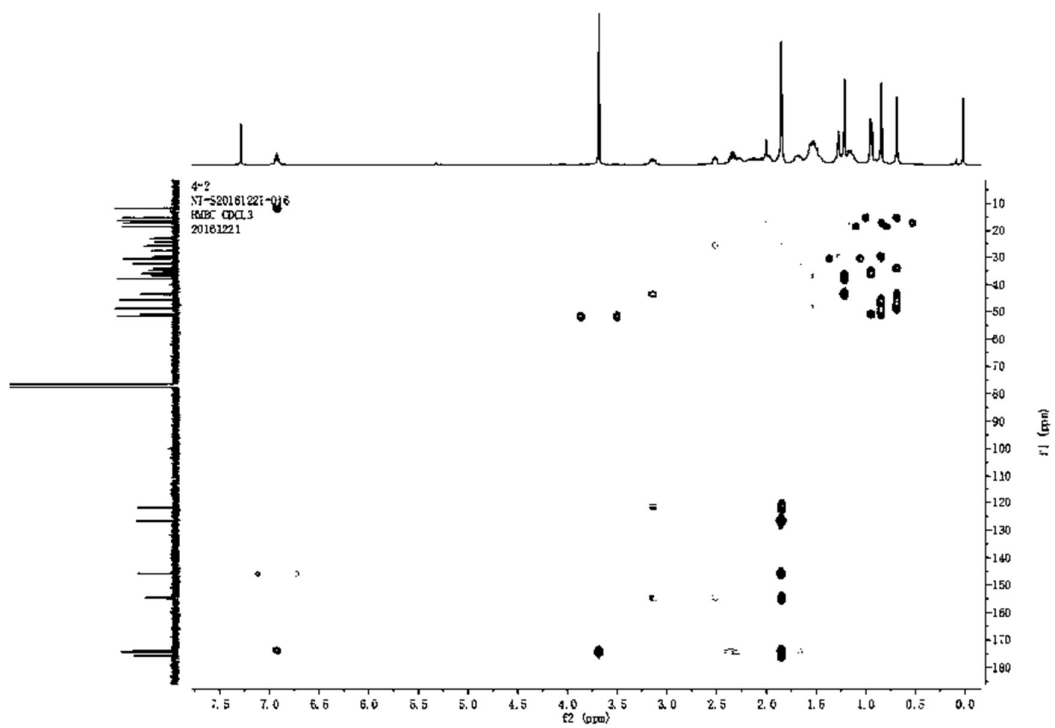

Figure S23. HMBC spectrum of compound 3

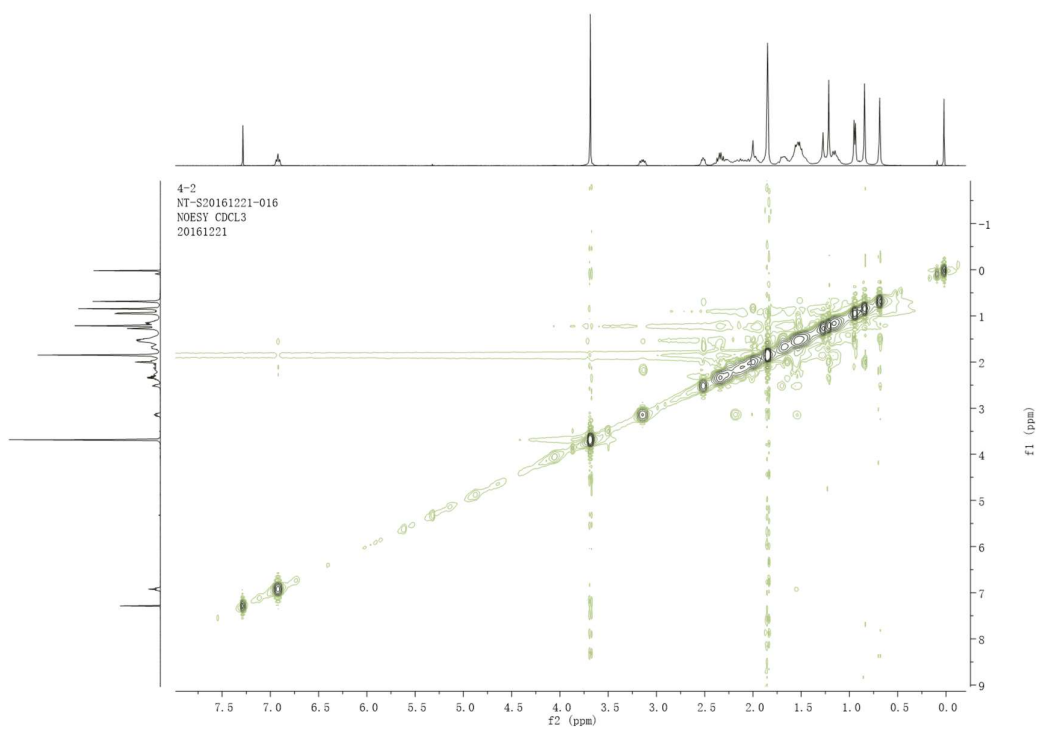

Figure S24. NOESY spectrum of compound 3

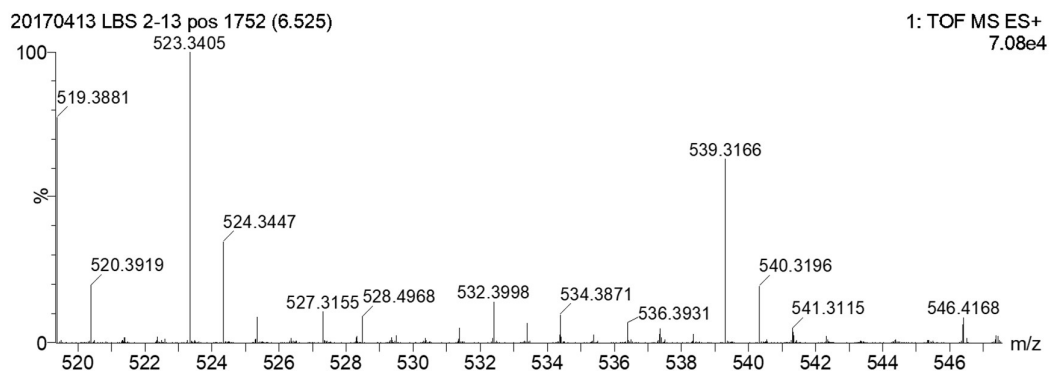

Figure S25. HR-ESI-MS spectrum of compound **4**

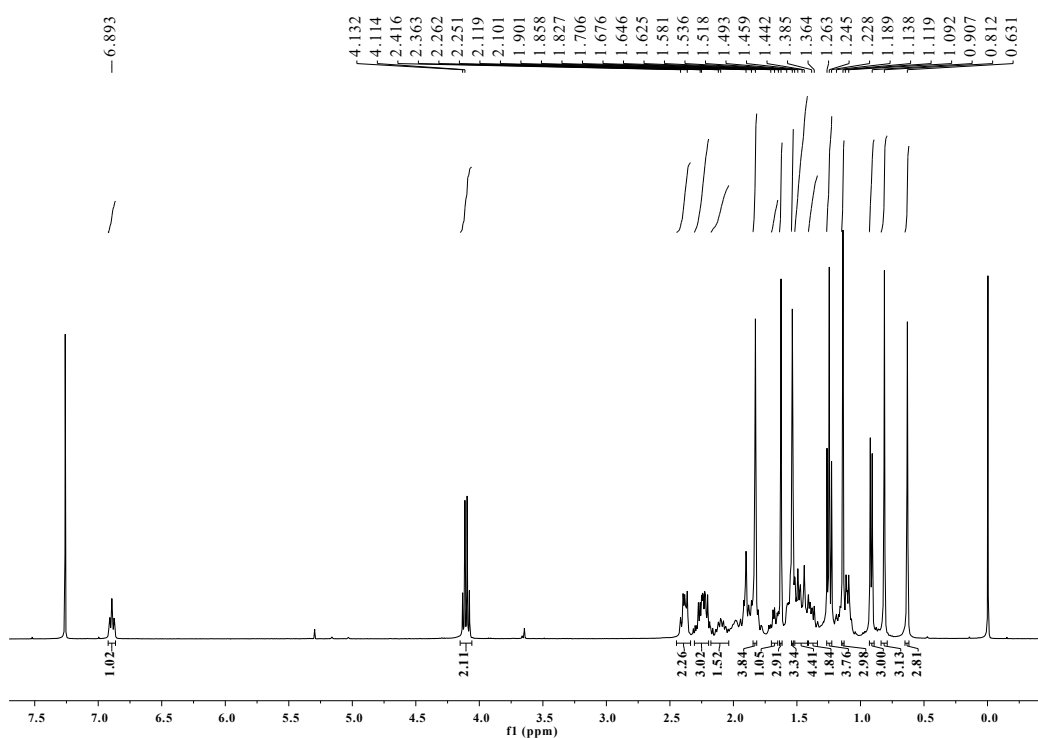

Figure S26.  $^1\text{H}$ -NMR spectrum of compound **4**

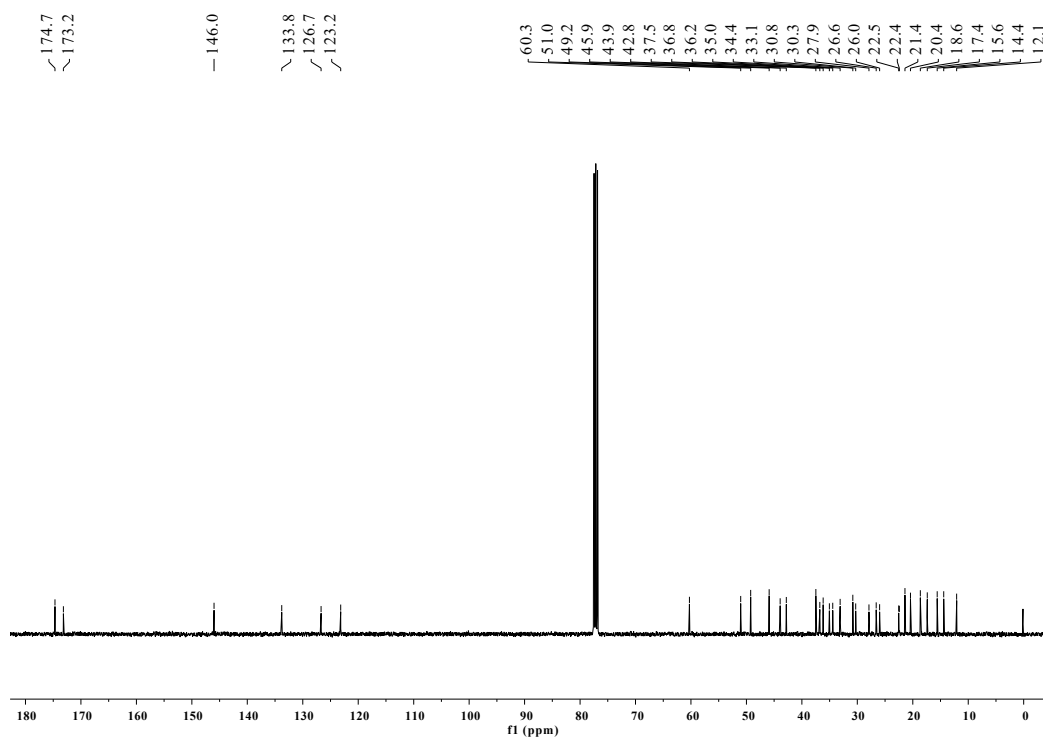

Figure S27.  $^{13}\text{C}$ -NMR spectrum of compound **4**

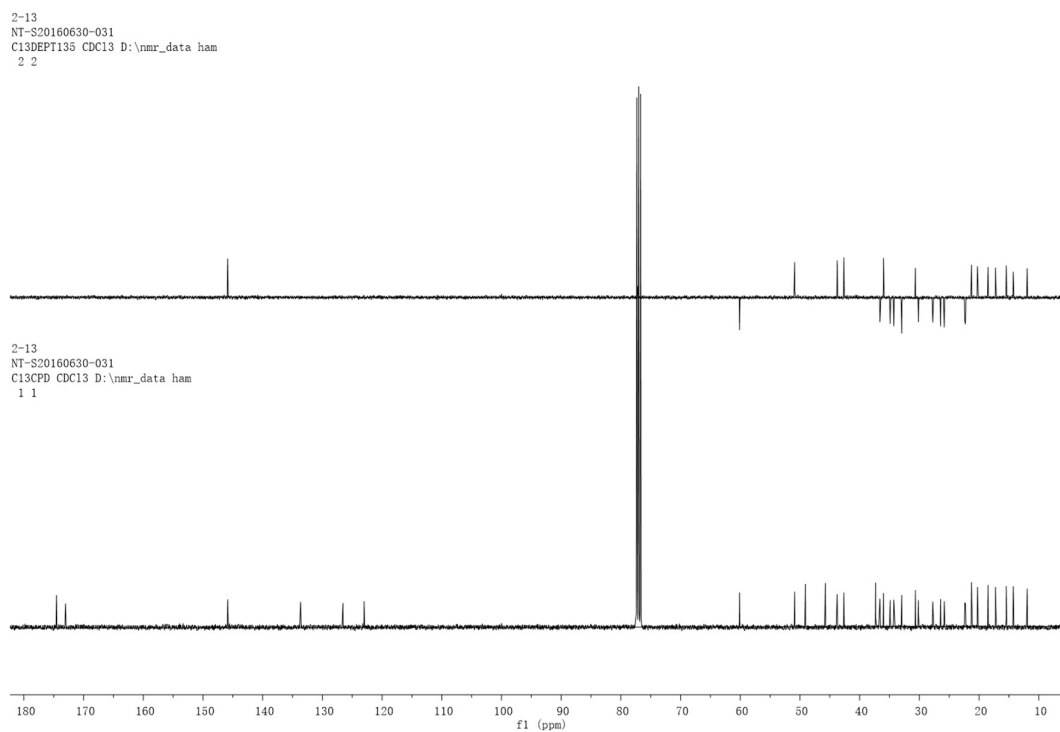

Figure S28. DEPT-135 spectrum of compound **4**

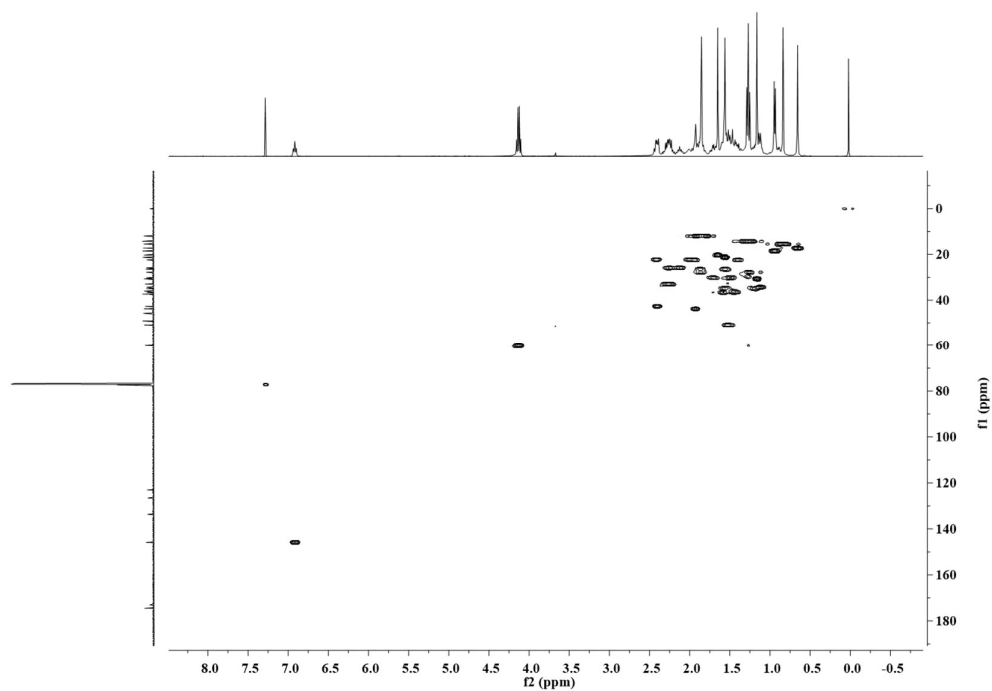

Figure S29. HSQC spectrum of compound 4

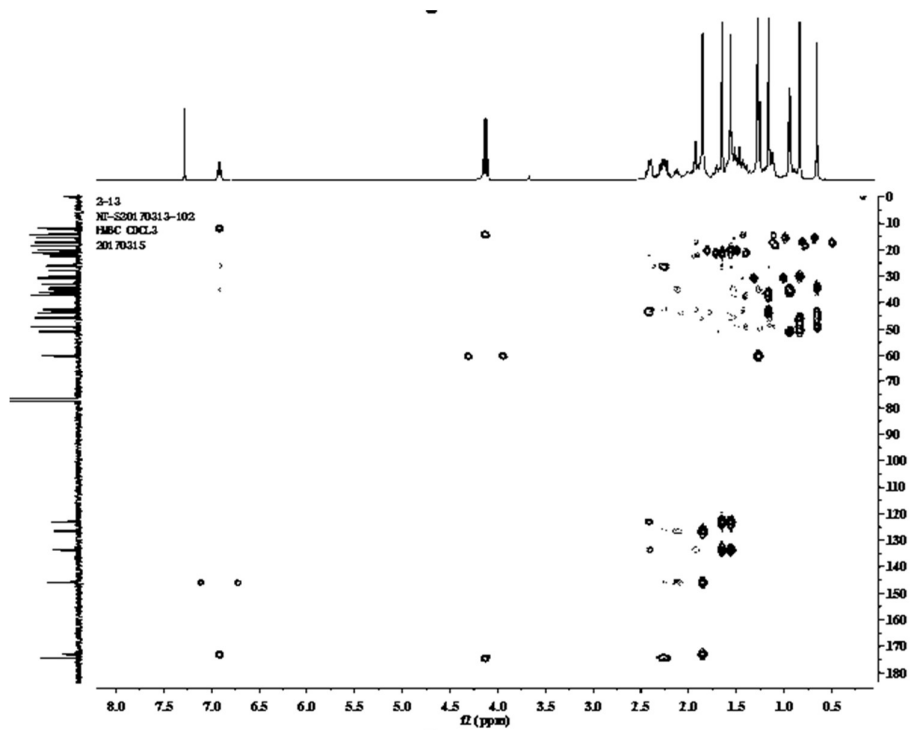

Figure S30. HMBC spectrum of compound 4



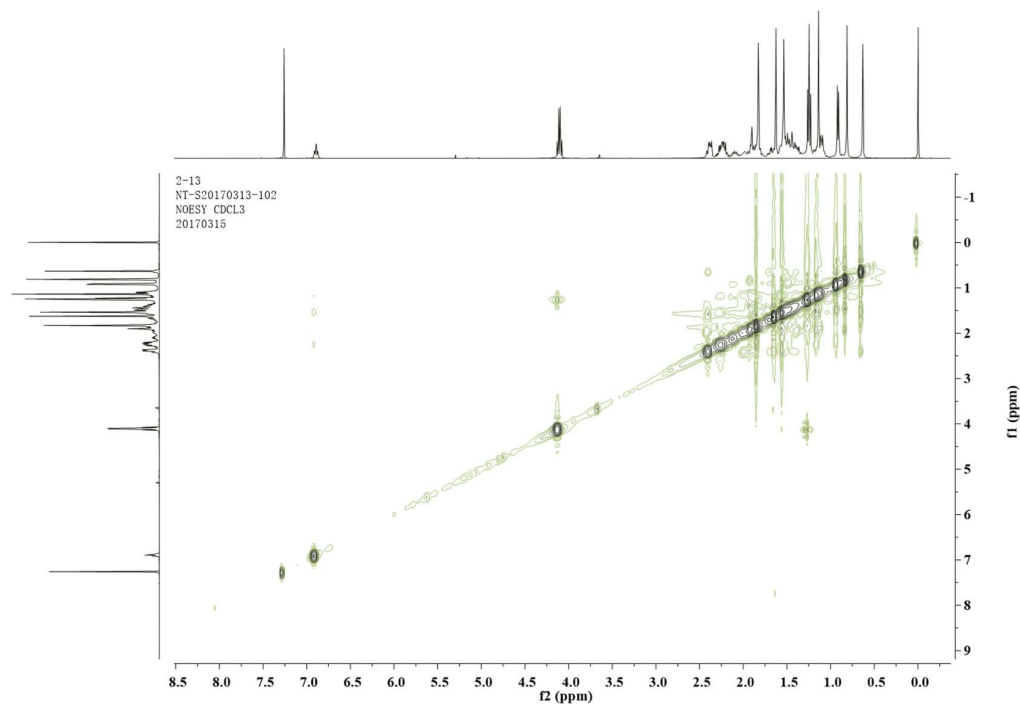

**Figure S31.** NOESY spectrum of compound **4**

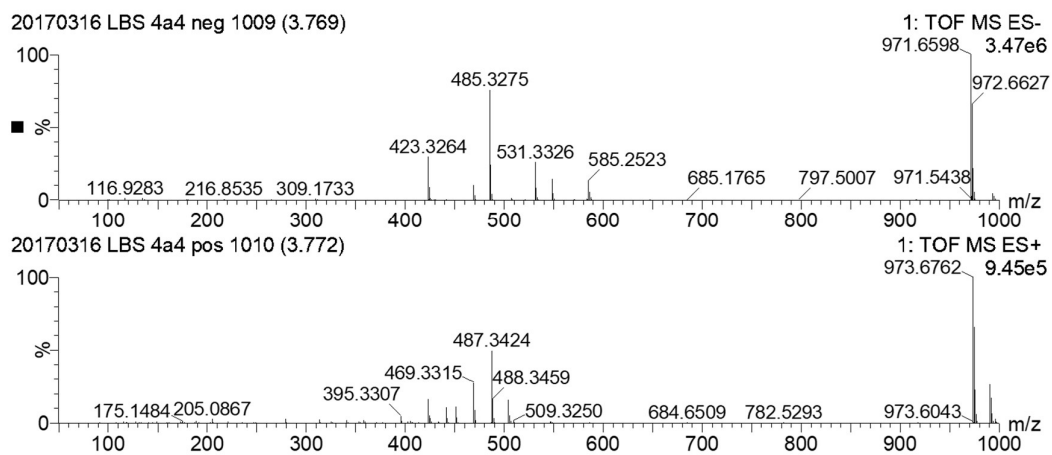

**Figure S32.** HR-ESI-MS spectrum of compound **5**

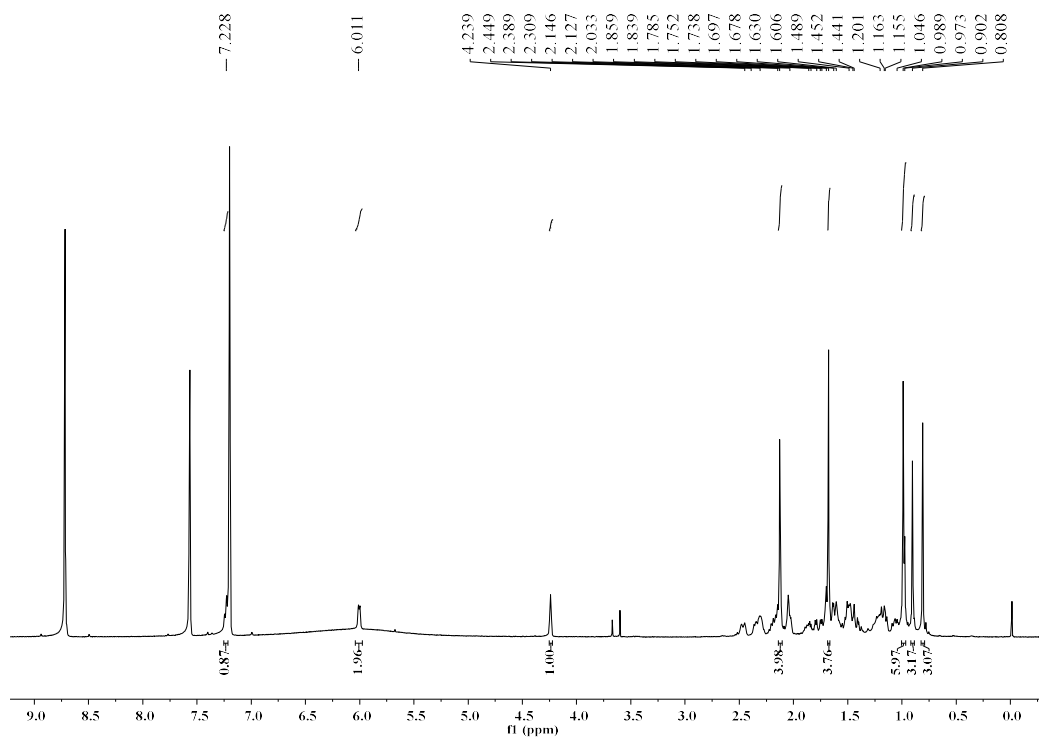

Figure S33. <sup>1</sup>H-NMR spectrum of compound 5

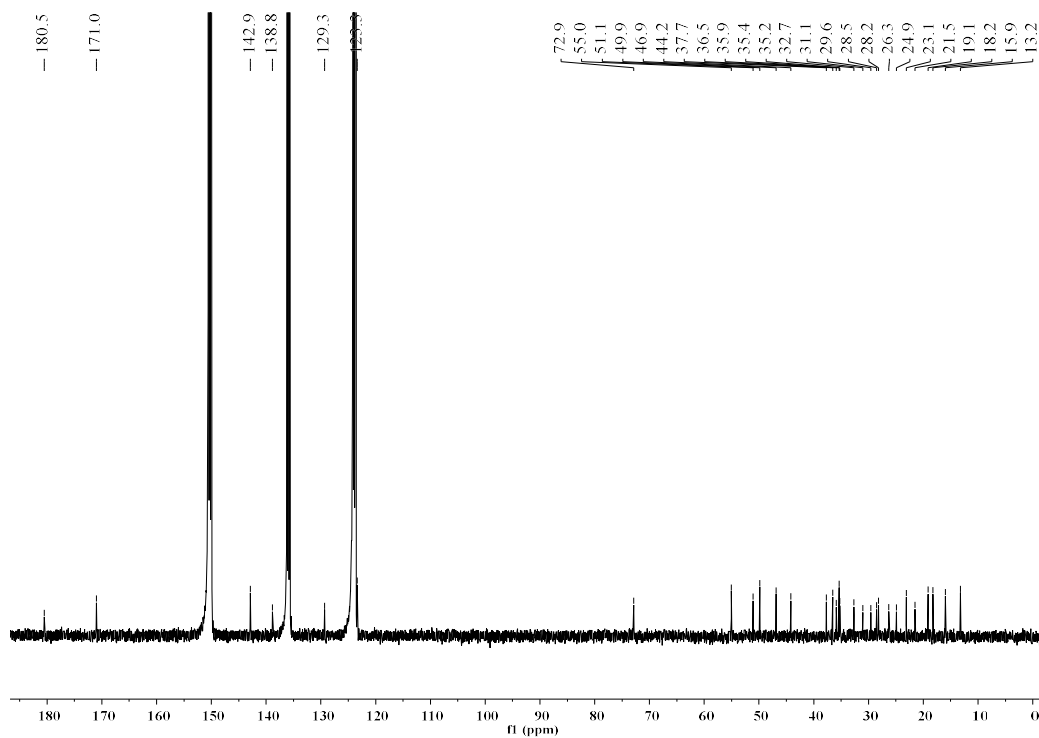

Figure S34. <sup>13</sup>C-NMR spectrum of compound 5

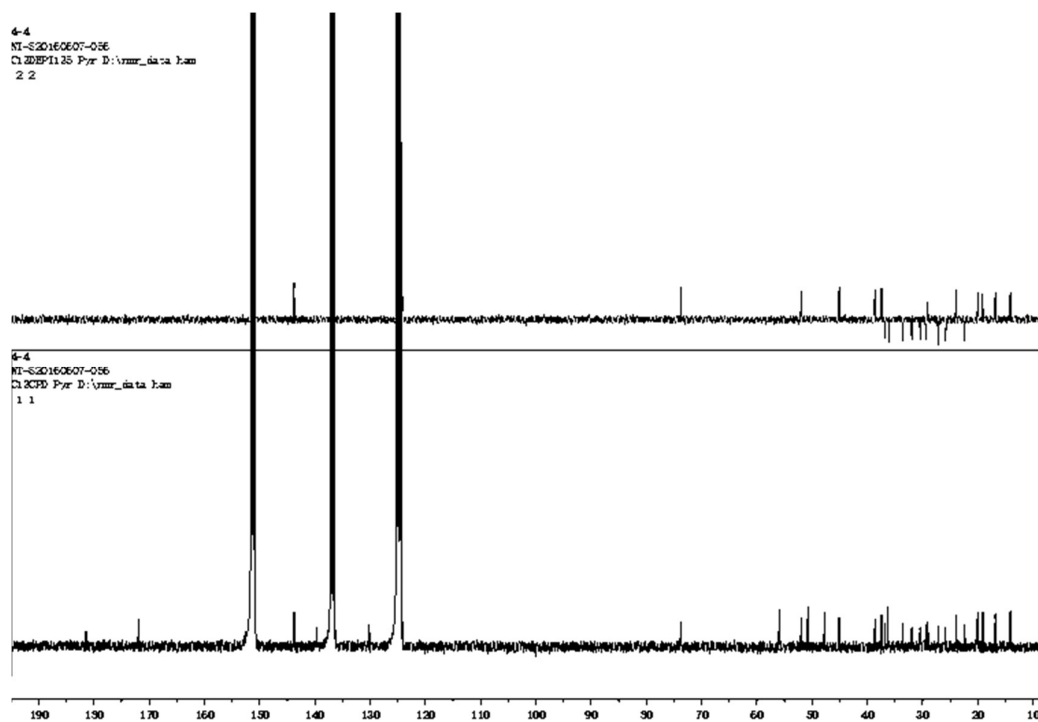

Figure S35. DEPT-135 spectrum of compound 5

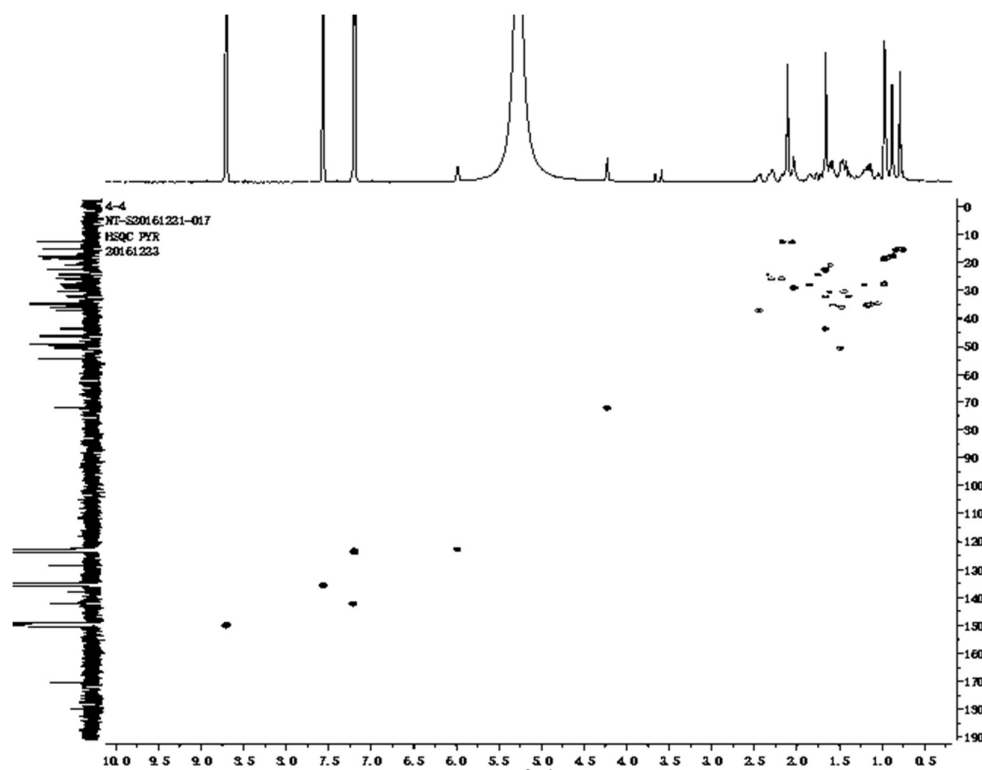

Figure S36. HSQC spectrum of compound 5

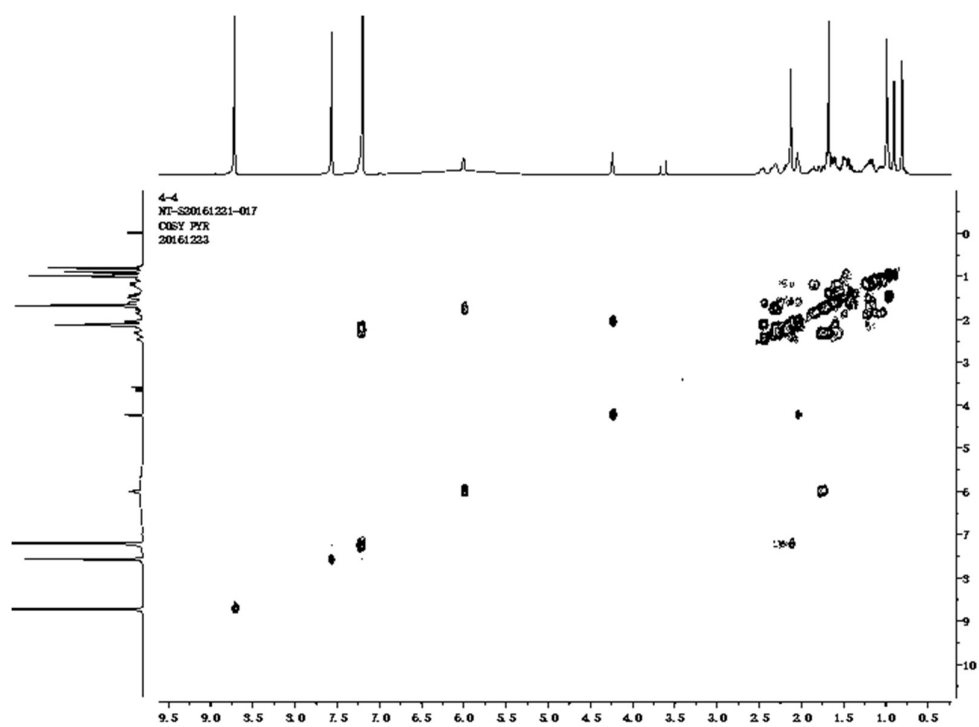

Figure S37.  $^1\text{H}$ - $^1\text{H}$  COSY spectrum of compound 5

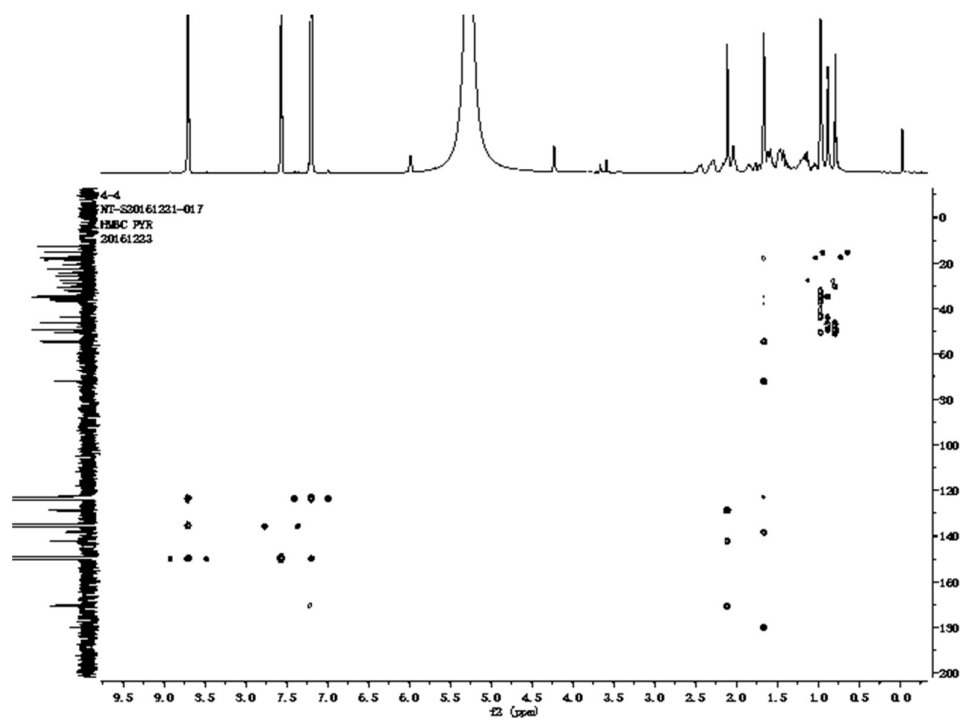

Figure S38. HMBC spectrum of compound 5

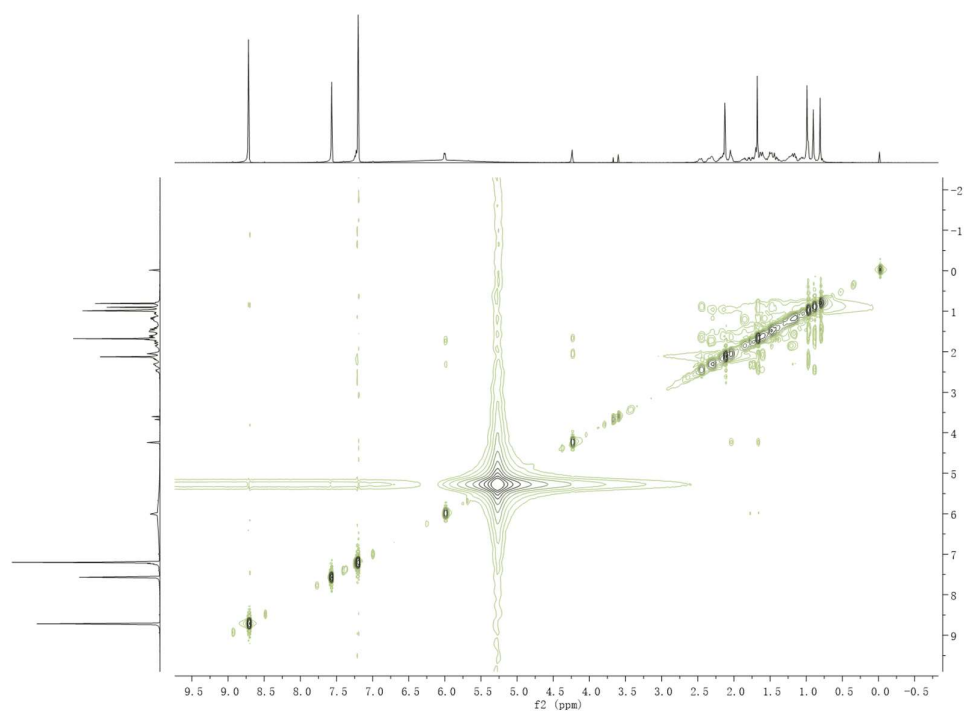

**Figure S39.** NOESY spectrum of compound **5**

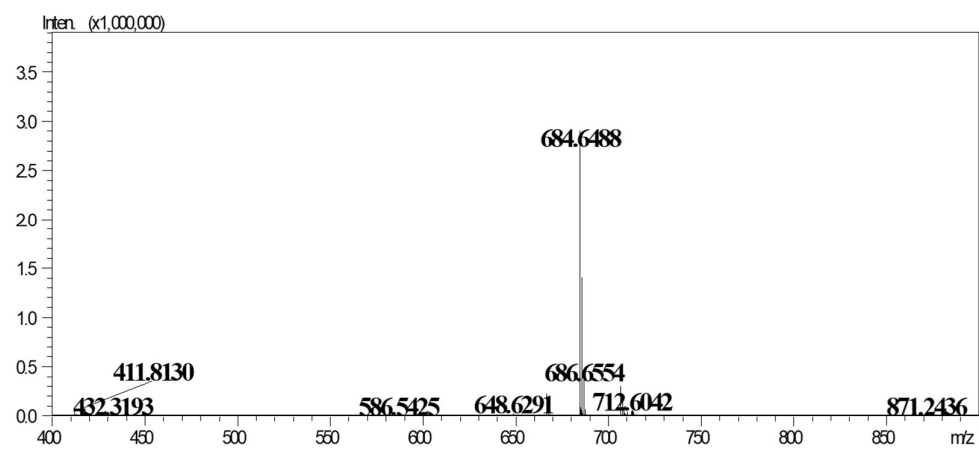

**Figure S40.** LC-IT-TOF-MS spectrum of compound **6**  $[M+H]^+$

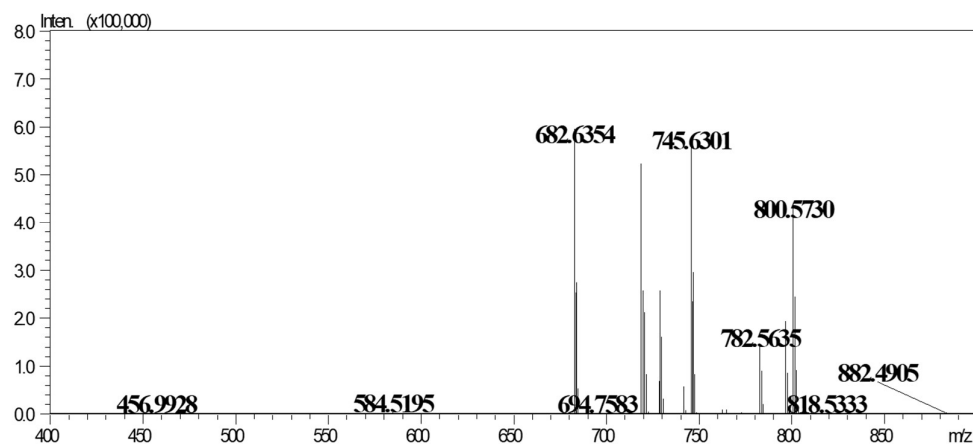

Figure S41. LC-IT-TOF-MS spectrum of compound 6 [M-H]<sup>-</sup>

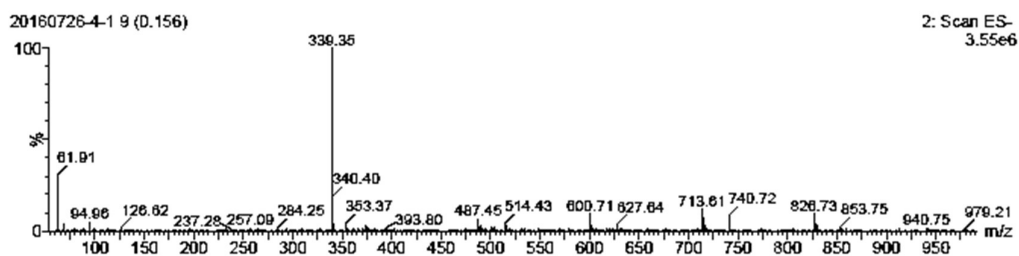

Figure S42. ESI-MS spectrum of compound 6

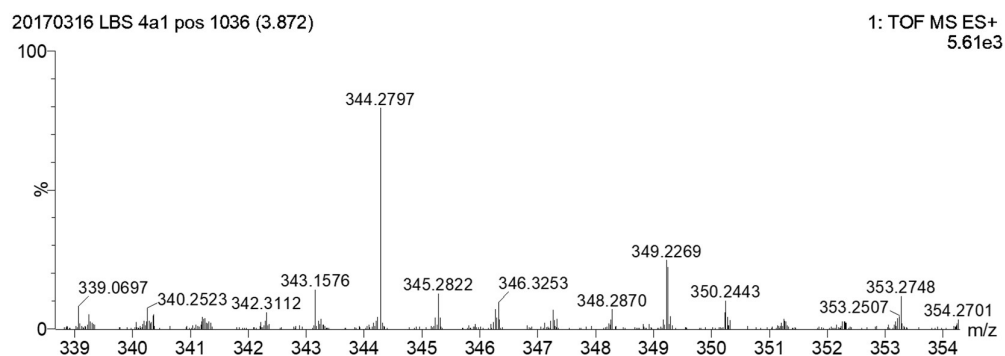

Figure S43. HR-ESI-MS spectrum of compound 6

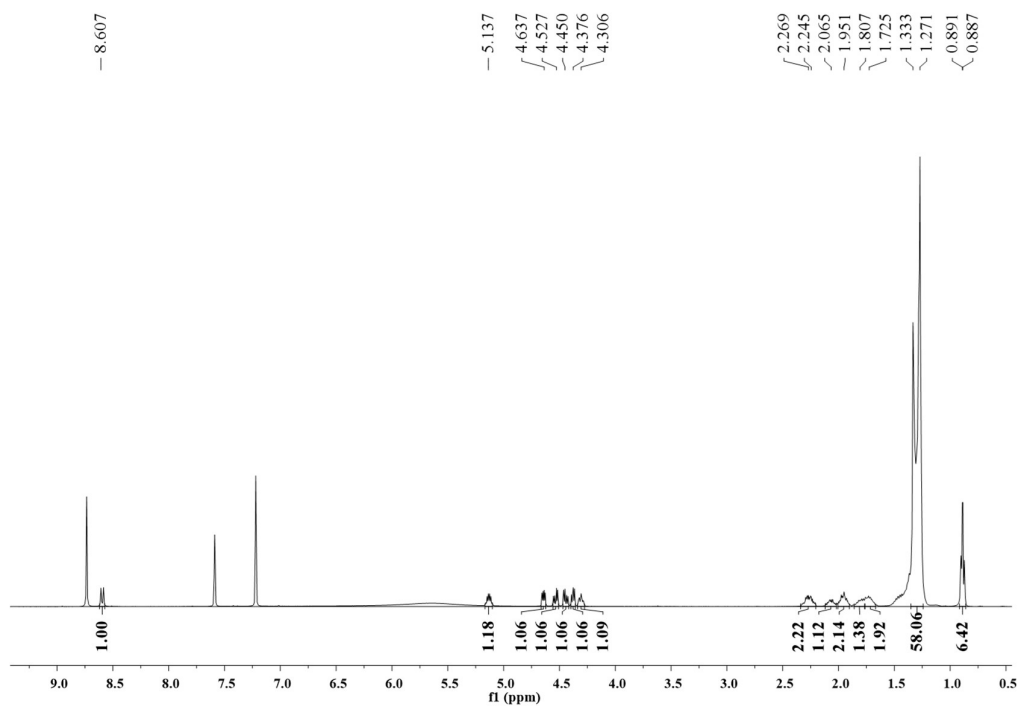

Figure S44. <sup>1</sup>H-NMR spectrum of compound 6

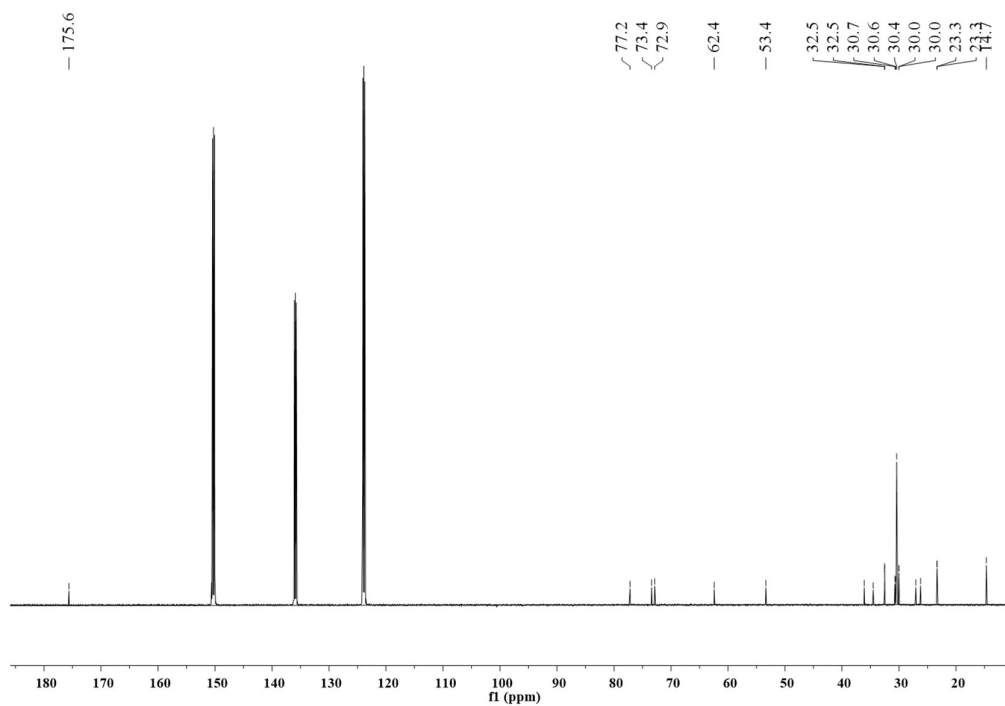

Figure S45. <sup>13</sup>C-NMR spectrum of compound 6

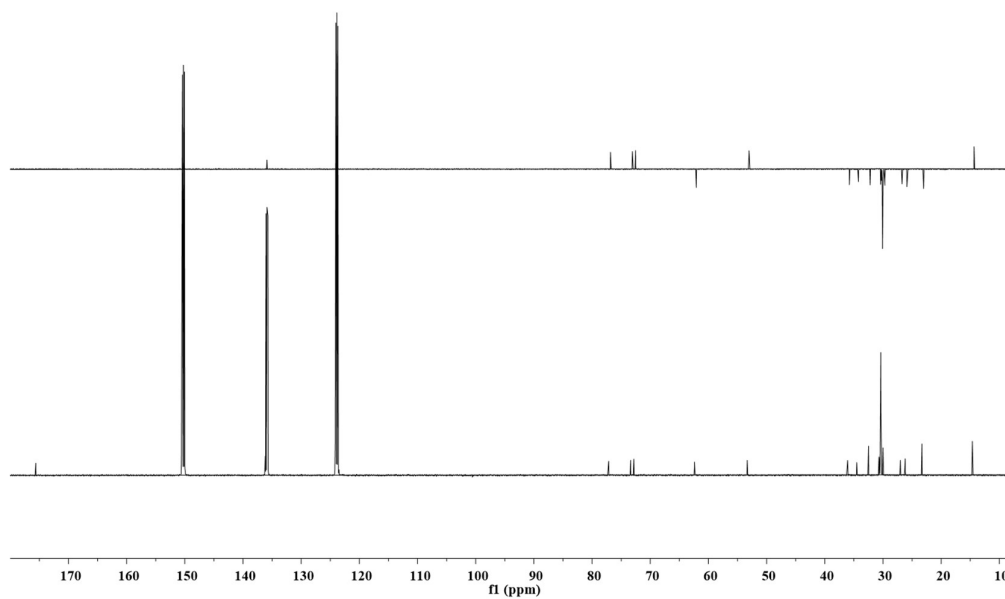

**Figure S46.** DEPT-135 spectrum of compound **6**

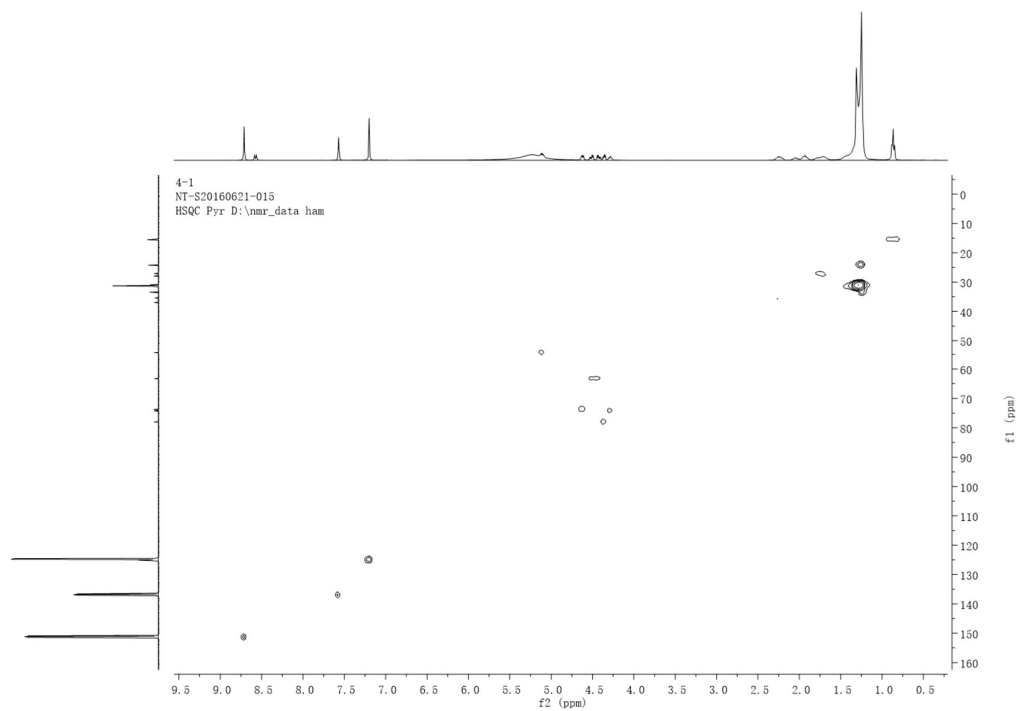

**Figure S47.** HSQC spectrum of compound **6**



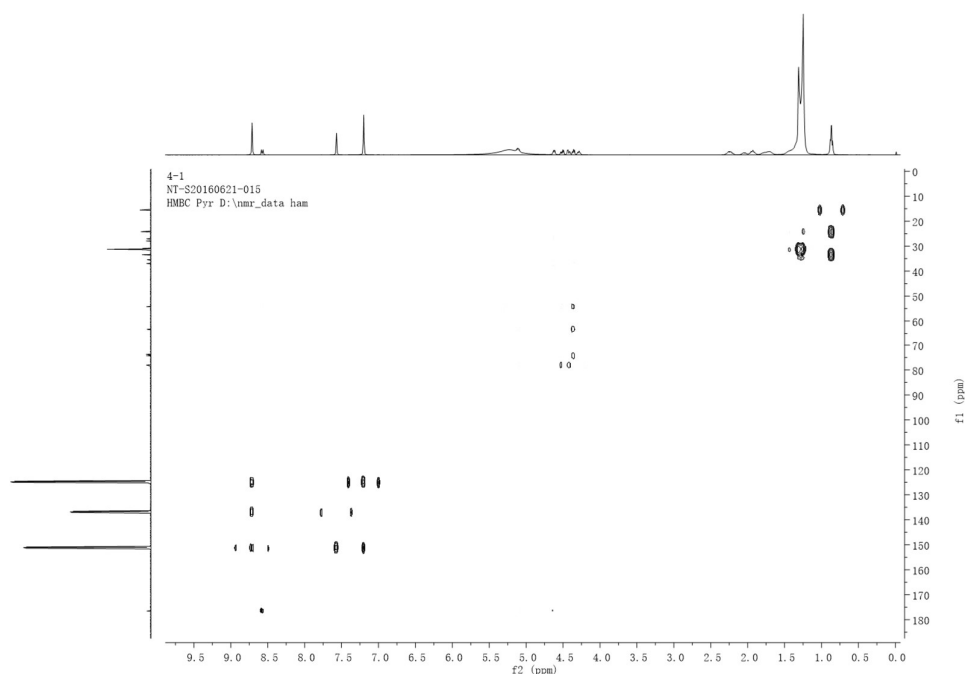

**Figure S48.** HMBC spectrum of compound **6**

**Table 1.** Identification of 15 isolates of 95% ethanol extract from the *R. vinosa* in positive ion mode.

| No. | Compound                                                                                                                                                                            | Calculated Value | Measured Value | Error (ppm) | Retention Time | Response Value |
|-----|-------------------------------------------------------------------------------------------------------------------------------------------------------------------------------------|------------------|----------------|-------------|----------------|----------------|
| 1   | vinosane                                                                                                                                                                            | 251.1642         | 251.1642       | 0           | 3.34           | 34,512         |
| 2   | rulepidadione C                                                                                                                                                                     | 251.1642         | 251.1634       | -3          | 13.15          | 220,742        |
| 3   | (24 <i>E</i> )-3, 4-seco-cucurbita-4, 24-diene-26, 29-dioic acid-3-methyl ester                                                                                                     | 517.3524         | 517.3518       | -1          | 25.91          | 22,767         |
| 4   | (24 <i>E</i> )-3, 4-seco-cucurbita-4, 24-diene-26-oic acid-3-ethyl ester                                                                                                            | 501.3938         | 501.3921       | -3          | 31.26          | 104,871        |
| 5   | (24 <i>E</i> )-3 $\beta$ -hydroxycucurbita-5, 24-diene-26, 29-dioic acid (2 <i>S</i> , 3 <i>S</i> , 4 <i>R</i> , 2' <i>R</i> )-2-(2'-hydroxydocosanoylamino) eicosane-1, 3, 4-triol | 487.3418         | 487.3414       | -1          | 22.5           | 232,364        |
| 6   | (24 <i>E</i> )-3, 4-secocucurbita-4, 24-diene-3, 26, 29-trioic acid                                                                                                                 | 503.3367         | 503.3377       | 2           | 24.54          | 26,112         |
| 7   | (24 <i>E</i> )-3, 4-secocucurbita-4, 24-diene-3, 26-dioic acid                                                                                                                      | 473.3625         | 473.3621       | -1          | 28.4           | 32,493         |
| 8   | (24 <i>E</i> )-3 $\beta$ -hydroxycucurbita-5, 24-diene-26-oic acid                                                                                                                  | 457.3676         | 457.3672       | -1          | 28.92          | 97,362         |
| 9   | rosacea acid B                                                                                                                                                                      | 457.3676         | 457.3665       | -2          | 28.1           | 53,392         |
| 10  | rosacea acid A                                                                                                                                                                      | 473.3625         | 473.3599       | -5          | 32.13          | 91,186         |
| 11  | 7 $\alpha$ , 8 $\alpha$ , 13-trihydroxy-marasm-5-oic acid $\gamma$ -lactone                                                                                                         | 267.1597         | 267.1591       | -2          | 10.29          | 49,460         |
| 12  | aristolone                                                                                                                                                                          | 219.1743         | 219.1739       | -2          | 15.42          | 1,258,191      |
| 13  | 7, 8-dimethylalloxazine                                                                                                                                                             | 243.0877         | 243.0872       | -2          | 4.61           | 424,705        |
| 14  | L-pyroglutamic acid                                                                                                                                                                 | 130.0499         | 130.0492       | -5          | 0.69           | 25,781         |
| 15  |                                                                                                                                                                                     |                  |                |             |                |                |

**Table 2.** Identification of 15 isolates of 95% ethanol extract from the *R. vinosa* in negative ion mode.

| No. | Compound                                                                    | Calculated Value | Measured Value | Error (ppm) | Retention Time | Response Value |
|-----|-----------------------------------------------------------------------------|------------------|----------------|-------------|----------------|----------------|
| 1   | vinosane                                                                    | 249.1491         | 249.1491       | 0           | 3.35           | 11,148         |
| 2   | rulepidadione C                                                             | 249.1491         | 249.1491       | 0           | 13.15          | 35,665         |
| 3   | (24E)-3, 4-seco-cucurbita-4, 24-diene-26, 29-dioic acid-3-methyl ester      | 515.3378         | 515.3376       | -0          | 25.62          | 2,081,276      |
| 4   | (24E)-3, 4-seco-cucurbita-4, 24-diene-26-oic acid-3-ethyl ester             | 499.3793         | 499.3797       | 1           | 31.27          | 2,701,378      |
| 5   | (24E)-3 $\beta$ -hydroxycucurbita-5, 24-diene-26, 29-dioic acid             | 485.3272         | 485.3269       | -1          | 22.51          | 237,837        |
| 6   | (2S, 3S, 4R, 2'R)-2-(2'-hydroxydocosanoylamino) eicosane-1, 3, 4-triol      | 682.6355         | 682.6367       | 2           | 31.75          | 11,754         |
| 7   | (24E)-3, 4-secocucurbita-4, 24-diene-3, 26, 29-trioic acid                  | 501.3222         | 501.3223       | 0           | 24.29          | 175,827        |
| 8   | (24E)-3, 4-secocucurbita-4, 24-diene-3, 26-dioic acid                       | 471.3480         | 471.3481       | 0           | 28.4           | 4,757,652      |
| 9   | (24E)-3 $\beta$ -hydroxycucurbita-5, 24-diene-26-oic acid                   | 455.3536         | 455.3525       | -2          | 29.07          | 2,466,945      |
| 10  | rosacea acid B                                                              | 455.3536         | 455.3531       | -1          | 28.25          | 3,001,109      |
| 11  | rosacea acid A                                                              | 471.3480         | 471.3481       | 0           | 32.33          | 7508           |
| 12  | 7 $\alpha$ , 8 $\alpha$ , 13-trihydroxy-marasm-5-oic acid $\gamma$ -lactone | 265.1445         | 265.1443       | -1          | 10.3           | 44,953         |
| 13  | aristolone                                                                  | 217.1598         | 217.1590       | -4          | 15.42          | 7760           |
| 14  | 7, 8-dimethylalloxazine                                                     | 241.0731         | 241.0727       | -1          | 4.61           | 72,213         |
| 15  | L-pyroglutamic acid                                                         | 128.0353         | 128.0349       | -3          | 0.82           | 214,720        |
